# Supplementary material for: Dual domain recognition determines SARS-CoV-2 PLpro selectivity for human ISG15 and K48-linked di-ubiquitin
Source: Nat Commun. 2023 Apr 25;14:2366. doi: 10.1038/s41467-023-38031-5 (PMC10126577; doi:10.1038/s41467-023-38031-5)
Supplement: Supplementary file 3 — Source Data [file 41467_2023_38031_MOESM3_ESM.xlsx]

## Sheet: Fig1b
	hISG15			Ub2			Ub1			Ub2 (D77)			Ub1 (D77)
	Mean	68.3% ESP (error-surface projection) confidence interval		Mean	68.3% ESP (error-surface projection) confidence interval		Mean	68.3% ESP (error-surface projection) confidence interval		Mean	68.3% ESP (error-surface projection) confidence interval		Mean	68.3% ESP (error-surface projection) confidence interval
KD1 [µM]	0.09	0.18	0.03	0.07	0.11	0.04	0.17	0.48	0.05	0.6	2.2	0.1	130	200	90
	Means and 68.3% confidence interval derived from error-surface projections determined in PALMIST 1.5.8. Normalized data is available in Source Data for Figure 5.
	Graphs plotted in Prism 9 version 9.5.0

## Sheet: Fig1c_SupplemetaryFig2c
Uncropped gels
	with Ub2										with hISG15											with Ub1

## Sheet: Fig1d_SupplementaryFig2f
Densitometry analysis from 3 replicates. Percentage of cut ISG15 estimated based on total ISG15 (uncut+cut).
Example replicate
	Replicates			Plotted
percent cut	1	2	3	Mean	SD
ISG15-Nsp2	89.7	86.8	86.4	87.6333	1.80093
ISG15-Nsp3	90	89.8	89.8	89.8667	0.11547
ISG15-Nsp4	87.4	78.6	81.4	82.4667	4.49592
	Means and SD calculated and plotted in Prism 9 version 9.5.0

## Sheet: Fig1e_SupplementaryFig2g
Densitometry analysis from 3 replicates. Percentage of cut ISG15 estimated based on total ISG15 (uncut+cut).
Example replicate
	Replicates			Plotted
percent cleaved substrate	1	2	3	Mean	SD
A158 (WT)	86.4	83	84.8	84.7333	1.70098
A158D	69.8	66.9	68.3	68.3333	1.45029
A158N	71.7	81.8	82.2	78.5667	5.95007
A158E	31.3	29.8	30	30.3667	0.814453
A158Q	68.9	68.8	69.7	69.1333	0.493288
	Calculated and plotted in Prism 9 version 9.5.0

## Sheet: Fig1f
Uncropped gel

## Sheet: Fig1g
Uncropped gel
Mass spectrometry data
0min			15min			25min
Point#	m/z	Intensity	Point#	m/z	Intensity	Point#	m/z	Intensity
1	400.005	2	1	400.005	3	1	400.005	3
2	400.017	5	2	400.017	4	2	400.017	2
3	400.029	6	3	400.029	-2	3	400.029	0
4	400.041	2	4	400.041	1	4	400.041	4
5	400.053	2	5	400.053	3	5	400.053	3
6	400.064	4	6	400.064	3	6	400.064	3
7	400.076	5	7	400.076	-3	7	400.076	0
8	400.088	2	8	400.088	1	8	400.088	4
9	400.099	2	9	400.099	3	9	400.099	3
10	400.111	4	10	400.111	4	10	400.111	2
11	400.123	6	11	400.123	-4	11	400.123	0
12	400.135	1	12	400.135	0	12	400.135	3
13	400.147	2	13	400.147	3	13	400.147	5
14	400.158	5	14	400.158	4	14	400.158	2
15	400.17	4	15	400.17	-5	15	400.17	0
16	400.182	1	16	400.182	0	16	400.182	3
17	400.194	3	17	400.194	2	17	400.194	5
18	400.205	6	18	400.205	5	18	400.205	2
19	400.217	6	19	400.217	-5	19	400.217	1
20	400.229	1	20	400.229	0	20	400.229	3
21	400.241	2	21	400.241	2	21	400.241	3
22	400.252	6	22	400.252	5	22	400.252	1
23	400.264	5	23	400.264	-5	23	400.264	1
24	400.276	0	24	400.276	1	24	400.276	3
25	400.288	3	25	400.288	1	25	400.288	3
26	400.3	6	26	400.3	6	26	400.3	0
27	400.311	5	27	400.311	-4	27	400.311	2
28	400.323	2	28	400.323	1	28	400.323	4
29	400.335	4	29	400.335	1	29	400.335	4
30	400.347	7	30	400.347	5	30	400.347	2
31	400.358	3	31	400.358	-3	31	400.358	4
32	400.37	3	32	400.37	1	32	400.37	4
33	400.382	4	33	400.382	1	33	400.382	4
34	400.394	8	34	400.394	6	34	400.394	2
35	400.406	2	35	400.406	-3	35	400.406	6
36	400.417	2	36	400.417	2	36	400.417	4
37	400.429	5	37	400.429	3	37	400.429	4
38	400.441	9	38	400.441	6	38	400.441	2
39	400.453	2	39	400.453	-3	39	400.453	5
40	400.464	2	40	400.464	2	40	400.464	3
41	400.476	3	41	400.476	2	41	400.476	5
42	400.488	9	42	400.488	5	42	400.488	2
43	400.5	3	43	400.5	-3	43	400.5	5
44	400.511	1	44	400.511	2	44	400.511	3
45	400.523	2	45	400.523	2	45	400.523	5
46	400.535	9	46	400.535	4	46	400.535	3
47	400.547	3	47	400.547	-2	47	400.547	5
48	400.558	-1	48	400.558	1	48	400.558	3
49	400.57	3	49	400.57	1	49	400.57	6
50	400.582	7	50	400.582	6	50	400.582	4
51	400.594	3	51	400.594	-2	51	400.594	5
52	400.606	0	52	400.606	1	52	400.606	3
53	400.617	1	53	400.617	1	53	400.617	5
54	400.629	8	54	400.629	5	54	400.629	4
55	400.641	3	55	400.641	-3	55	400.641	5
56	400.653	0	56	400.653	1	56	400.653	3
57	400.664	2	57	400.664	1	57	400.664	5
58	400.676	7	58	400.676	5	58	400.676	4
59	400.688	1	59	400.688	-2	59	400.688	3
60	400.7	0	60	400.7	1	60	400.7	2
61	400.712	2	61	400.712	1	61	400.712	5
62	400.723	7	62	400.723	5	62	400.723	3
63	400.735	1	63	400.735	-1	63	400.735	4
64	400.747	0	64	400.747	2	64	400.747	3
65	400.759	1	65	400.759	1	65	400.759	5
66	400.77	6	66	400.77	5	66	400.77	4
67	400.782	0	67	400.782	0	67	400.782	2
68	400.794	-1	68	400.794	1	68	400.794	2
69	400.806	1	69	400.806	1	69	400.806	5
70	400.817	7	70	400.817	6	70	400.817	4
71	400.829	1	71	400.829	1	71	400.829	3
72	400.841	-1	72	400.841	0	72	400.841	2
73	400.853	1	73	400.853	0	73	400.853	5
74	400.865	6	74	400.865	5	74	400.865	4
75	400.876	2	75	400.876	0	75	400.876	3
76	400.888	-1	76	400.888	1	76	400.888	2
77	400.9	2	77	400.9	1	77	400.9	4
78	400.912	7	78	400.912	3	78	400.912	6
79	400.923	3	79	400.923	1	79	400.923	4
80	400.935	-1	80	400.935	1	80	400.935	2
81	400.947	0	81	400.947	3	81	400.947	5
82	400.959	7	82	400.959	4	82	400.959	6
83	400.971	3	83	400.971	1	83	400.971	2
84	400.982	-2	84	400.982	1	84	400.982	2
85	400.994	0	85	400.994	3	85	400.994	4
86	401.006	8	86	401.006	2	86	401.006	4
87	401.018	2	87	401.018	1	87	401.018	3
88	401.029	1	88	401.029	-1	88	401.029	0
89	401.041	0	89	401.041	2	89	401.041	3
90	401.053	8	90	401.053	3	90	401.053	4
91	401.065	2	91	401.065	2	91	401.065	3
92	401.077	0	92	401.077	-1	92	401.077	2
93	401.088	1	93	401.088	2	93	401.088	3
94	401.1	6	94	401.1	2	94	401.1	4
95	401.112	3	95	401.112	2	95	401.112	4
96	401.124	1	96	401.124	0	96	401.124	2
97	401.136	-2	97	401.136	1	97	401.136	3
98	401.147	5	98	401.147	1	98	401.147	3
99	401.159	2	99	401.159	1	99	401.159	3
100	401.171	2	100	401.171	1	100	401.171	2
101	401.183	0	101	401.183	1	101	401.183	4
102	401.195	7	102	401.195	1	102	401.195	4
103	401.206	3	103	401.206	1	103	401.206	2
104	401.218	4	104	401.218	1	104	401.218	1
105	401.23	3	105	401.23	1	105	401.23	5
106	401.242	6	106	401.242	0	106	401.242	3
107	401.253	3	107	401.253	3	107	401.253	3
108	401.265	3	108	401.265	2	108	401.265	1
109	401.277	2	109	401.277	1	109	401.277	3
110	401.289	7	110	401.289	1	110	401.289	1
111	401.3	2	111	401.3	3	111	401.3	2
112	401.312	3	112	401.312	1	112	401.312	1
113	401.324	1	113	401.324	1	113	401.324	4
114	401.336	8	114	401.336	1	114	401.336	0
115	401.348	3	115	401.348	5	115	401.348	4
116	401.359	5	116	401.359	2	116	401.359	3
117	401.371	0	117	401.371	1	117	401.371	5
118	401.383	8	118	401.383	1	118	401.383	1
119	401.395	3	119	401.395	4	119	401.395	1
120	401.407	6	120	401.407	2	120	401.407	4
121	401.418	1	121	401.418	2	121	401.418	5
122	401.43	8	122	401.43	2	122	401.43	3
123	401.442	3	123	401.442	6	123	401.442	3
124	401.454	5	124	401.454	4	124	401.454	4
125	401.466	0	125	401.466	3	125	401.466	6
126	401.477	6	126	401.477	4	126	401.477	4
127	401.489	0	127	401.489	5	127	401.489	4
128	401.501	5	128	401.501	2	128	401.501	4
129	401.513	-2	129	401.513	4	129	401.513	6
130	401.524	6	130	401.524	4	130	401.524	6
131	401.536	-1	131	401.536	5	131	401.536	5
132	401.548	3	132	401.548	2	132	401.548	4
133	401.56	-2	133	401.56	4	133	401.56	6
134	401.572	5	134	401.572	3	134	401.572	5
135	401.583	-3	135	401.583	5	135	401.583	6
136	401.595	4	136	401.595	2	136	401.595	4
137	401.607	-3	137	401.607	2	137	401.607	7
138	401.619	5	138	401.619	4	138	401.619	6
139	401.63	-1	139	401.63	4	139	401.63	4
140	401.642	4	140	401.642	2	140	401.642	5
141	401.654	-2	141	401.654	2	141	401.654	7
142	401.666	4	142	401.666	2	142	401.666	5
143	401.678	-1	143	401.678	4	143	401.678	5
144	401.69	6	144	401.69	2	144	401.69	5
145	401.701	-2	145	401.701	2	145	401.701	7
146	401.713	3	146	401.713	3	146	401.713	4
147	401.725	-1	147	401.725	4	147	401.725	4
148	401.737	6	148	401.737	2	148	401.737	5
149	401.748	-1	149	401.748	2	149	401.748	6
150	401.76	2	150	401.76	2	150	401.76	5
151	401.772	0	151	401.772	4	151	401.772	4
152	401.784	6	152	401.784	2	152	401.784	3
153	401.796	-1	153	401.796	3	153	401.796	5
154	401.807	3	154	401.807	2	154	401.807	5
155	401.819	1	155	401.819	4	155	401.819	3
156	401.831	5	156	401.831	2	156	401.831	3
157	401.843	0	157	401.843	3	157	401.843	4
158	401.854	3	158	401.854	-1	158	401.854	4
159	401.866	2	159	401.866	1	159	401.866	3
160	401.878	2	160	401.878	2	160	401.878	1
161	401.89	-1	161	401.89	2	161	401.89	3
162	401.902	5	162	401.902	0	162	401.902	4
163	401.913	2	163	401.913	1	163	401.913	4
164	401.925	1	164	401.925	2	164	401.925	2
165	401.937	0	165	401.937	1	165	401.937	4
166	401.949	6	166	401.949	0	166	401.949	3
167	401.961	2	167	401.961	2	167	401.961	3
168	401.973	3	168	401.973	2	168	401.973	1
169	401.984	-1	169	401.984	2	169	401.984	3
170	401.996	6	170	401.996	0	170	401.996	4
171	402.008	1	171	402.008	1	171	402.008	3
172	402.02	2	172	402.02	2	172	402.02	1
173	402.031	-1	173	402.031	2	173	402.031	3
174	402.043	6	174	402.043	2	174	402.043	4
175	402.055	2	175	402.055	1	175	402.055	4
176	402.067	3	176	402.067	2	176	402.067	-1
177	402.079	-3	177	402.079	1	177	402.079	3
178	402.09	6	178	402.09	1	178	402.09	3
179	402.102	2	179	402.102	2	179	402.102	4
180	402.114	3	180	402.114	2	180	402.114	0
181	402.126	-2	181	402.126	2	181	402.126	3
182	402.138	5	182	402.138	0	182	402.138	3
183	402.149	2	183	402.149	2	183	402.149	3
184	402.161	4	184	402.161	1	184	402.161	0
185	402.173	-4	185	402.173	1	185	402.173	3
186	402.185	5	186	402.185	1	186	402.185	3
187	402.197	2	187	402.197	1	187	402.197	3
188	402.208	4	188	402.208	0	188	402.208	0
189	402.22	-4	189	402.22	0	189	402.22	3
190	402.232	4	190	402.232	1	190	402.232	3
191	402.244	3	191	402.244	3	191	402.244	3
192	402.255	5	192	402.255	0	192	402.255	-1
193	402.267	-4	193	402.267	0	193	402.267	4
194	402.279	7	194	402.279	1	194	402.279	2
195	402.291	2	195	402.291	2	195	402.291	3
196	402.303	4	196	402.303	0	196	402.303	0
197	402.315	-2	197	402.315	-1	197	402.315	4
198	402.326	7	198	402.326	2	198	402.326	4
199	402.338	2	199	402.338	3	199	402.338	4
200	402.35	4	200	402.35	-1	200	402.35	0
201	402.362	-3	201	402.362	0	201	402.362	4
202	402.373	6	202	402.373	3	202	402.373	3
203	402.385	4	203	402.385	3	203	402.385	4
204	402.397	5	204	402.397	0	204	402.397	1
205	402.409	-5	205	402.409	0	205	402.409	4
206	402.421	8	206	402.421	3	206	402.421	3
207	402.433	4	207	402.433	3	207	402.433	5
208	402.444	4	208	402.444	1	208	402.444	1
209	402.456	-4	209	402.456	0	209	402.456	6
210	402.468	6	210	402.468	4	210	402.468	2
211	402.48	4	211	402.48	2	211	402.48	5
212	402.491	5	212	402.491	2	212	402.491	0
213	402.503	-5	213	402.503	0	213	402.503	6
214	402.515	1	214	402.515	1	214	402.515	4
215	402.527	4	215	402.527	1	215	402.527	3
216	402.539	7	216	402.539	2	216	402.539	1
217	402.55	-5	217	402.55	1	217	402.55	6
218	402.562	4	218	402.562	3	218	402.562	3
219	402.574	3	219	402.574	2	219	402.574	4
220	402.586	8	220	402.586	2	220	402.586	1
221	402.598	-4	221	402.598	0	221	402.598	4
222	402.61	2	222	402.61	0	222	402.61	5
223	402.621	1	223	402.621	4	223	402.621	3
224	402.633	3	224	402.633	3	224	402.633	1
225	402.645	-5	225	402.645	1	225	402.645	4
226	402.657	2	226	402.657	-1	226	402.657	4
227	402.669	1	227	402.669	4	227	402.669	2
228	402.68	3	228	402.68	2	228	402.68	1
229	402.692	-7	229	402.692	0	229	402.692	6
230	402.704	1	230	402.704	-1	230	402.704	3
231	402.716	1	231	402.716	3	231	402.716	3
232	402.728	2	232	402.728	1	232	402.728	1
233	402.739	-6	233	402.739	0	233	402.739	3
234	402.751	1	234	402.751	-2	234	402.751	2
235	402.763	0	235	402.763	2	235	402.763	3
236	402.775	4	236	402.775	1	236	402.775	1
237	402.787	-5	237	402.787	0	237	402.787	3
238	402.798	3	238	402.798	-2	238	402.798	1
239	402.81	0	239	402.81	1	239	402.81	1
240	402.822	4	240	402.822	2	240	402.822	0
241	402.834	-4	241	402.834	0	241	402.834	4
242	402.846	3	242	402.846	-2	242	402.846	0
243	402.857	0	243	402.857	-1	243	402.857	0
244	402.869	2	244	402.869	2	244	402.869	2
245	402.881	-3	245	402.881	0	245	402.881	5
246	402.893	3	246	402.893	-2	246	402.893	0
247	402.905	0	247	402.905	0	247	402.905	0
248	402.916	3	248	402.916	3	248	402.916	1
249	402.928	-4	249	402.928	0	249	402.928	6
250	402.94	2	250	402.94	-1	250	402.94	0
251	402.952	0	251	402.952	1	251	402.952	2
252	402.964	2	252	402.964	4	252	402.964	2
253	402.976	-2	253	402.976	0	253	402.976	5
254	402.987	2	254	402.987	-2	254	402.987	1
255	402.999	-1	255	402.999	1	255	402.999	2
256	403.011	3	256	403.011	3	256	403.011	1
257	403.023	-4	257	403.023	-1	257	403.023	5
258	403.034	1	258	403.034	-1	258	403.034	-1
259	403.046	0	259	403.046	2	259	403.046	2
260	403.058	1	260	403.058	4	260	403.058	2
261	403.07	-5	261	403.07	-1	261	403.07	5
262	403.082	1	262	403.082	-1	262	403.082	0
263	403.094	0	263	403.094	3	263	403.094	2
264	403.105	2	264	403.105	3	264	403.105	1
265	403.117	-3	265	403.117	0	265	403.117	5
266	403.129	0	266	403.129	-2	266	403.129	0
267	403.141	0	267	403.141	3	267	403.141	2
268	403.153	2	268	403.153	4	268	403.153	0
269	403.164	-7	269	403.164	0	269	403.164	3
270	403.176	1	270	403.176	-3	270	403.176	2
271	403.188	-1	271	403.188	3	271	403.188	2
272	403.2	2	272	403.2	4	272	403.2	1
273	403.212	-4	273	403.212	1	273	403.212	3
274	403.224	-1	274	403.224	-3	274	403.224	1
275	403.235	1	275	403.235	2	275	403.235	3
276	403.247	2	276	403.247	5	276	403.247	1
277	403.259	-4	277	403.259	0	277	403.259	4
278	403.271	-2	278	403.271	-4	278	403.271	1
279	403.283	3	279	403.283	5	279	403.283	4
280	403.294	3	280	403.294	2	280	403.294	0
281	403.306	-2	281	403.306	1	281	403.306	5
282	403.318	1	282	403.318	-3	282	403.318	1
283	403.33	6	283	403.33	7	283	403.33	4
284	403.342	7	284	403.342	6	284	403.342	3
285	403.353	3	285	403.353	7	285	403.353	8
286	403.365	8	286	403.365	2	286	403.365	3
287	403.377	15	287	403.377	12	287	403.377	8
288	403.389	19	288	403.389	11	288	403.389	7
289	403.401	18	289	403.401	16	289	403.401	12
290	403.413	26	290	403.413	14	290	403.413	8
291	403.424	27	291	403.424	26	291	403.424	16
292	403.436	26	292	403.436	18	292	403.436	13
293	403.448	27	293	403.448	28	293	403.448	24
294	403.46	28	294	403.46	22	294	403.46	16
295	403.472	28	295	403.472	31	295	403.472	22
296	403.483	28	296	403.483	22	296	403.483	17
297	403.495	19	297	403.495	23	297	403.495	22
298	403.507	20	298	403.507	18	298	403.507	16
299	403.519	20	299	403.519	26	299	403.519	19
300	403.531	21	300	403.531	19	300	403.531	14
301	403.543	17	301	403.543	22	301	403.543	24
302	403.554	19	302	403.554	20	302	403.554	16
303	403.566	19	303	403.566	25	303	403.566	20
304	403.578	19	304	403.578	18	304	403.578	15
305	403.59	13	305	403.59	19	305	403.59	21
306	403.602	15	306	403.602	17	306	403.602	13
307	403.613	13	307	403.613	21	307	403.613	18
308	403.625	17	308	403.625	15	308	403.625	14
309	403.637	7	309	403.637	15	309	403.637	16
310	403.649	10	310	403.649	12	310	403.649	9
311	403.661	11	311	403.661	17	311	403.661	15
312	403.673	12	312	403.673	11	312	403.673	11
313	403.684	5	313	403.684	12	313	403.684	14
314	403.696	7	314	403.696	9	314	403.696	6
315	403.708	8	315	403.708	16	315	403.708	13
316	403.72	10	316	403.72	10	316	403.72	9
317	403.732	3	317	403.732	10	317	403.732	10
318	403.743	5	318	403.743	5	318	403.743	4
319	403.755	6	319	403.755	13	319	403.755	11
320	403.767	7	320	403.767	6	320	403.767	7
321	403.779	2	321	403.779	8	321	403.779	9
322	403.791	3	322	403.791	3	322	403.791	4
323	403.803	5	323	403.803	11	323	403.803	9
324	403.814	5	324	403.814	7	324	403.814	7
325	403.826	1	325	403.826	8	325	403.826	9
326	403.838	2	326	403.838	4	326	403.838	3
327	403.85	5	327	403.85	9	327	403.85	9
328	403.862	4	328	403.862	7	328	403.862	6
329	403.873	2	329	403.873	7	329	403.873	9
330	403.885	2	330	403.885	2	330	403.885	3
331	403.897	5	331	403.897	10	331	403.897	7
332	403.909	3	332	403.909	8	332	403.909	4
333	403.921	2	333	403.921	7	333	403.921	9
334	403.933	1	334	403.933	2	334	403.933	2
335	403.944	6	335	403.944	9	335	403.944	8
336	403.956	4	336	403.956	7	336	403.956	4
337	403.968	2	337	403.968	8	337	403.968	8
338	403.98	1	338	403.98	2	338	403.98	3
339	403.992	5	339	403.992	9	339	403.992	6
340	404.003	4	340	404.003	6	340	404.003	3
341	404.015	-3	341	404.015	5	341	404.015	5
342	404.027	-1	342	404.027	2	342	404.027	3
343	404.039	3	343	404.039	9	343	404.039	6
344	404.051	3	344	404.051	6	344	404.051	3
345	404.063	-4	345	404.063	6	345	404.063	5
346	404.074	-3	346	404.074	2	346	404.074	2
347	404.086	2	347	404.086	9	347	404.086	5
348	404.098	2	348	404.098	6	348	404.098	3
349	404.11	-3	349	404.11	4	349	404.11	5
350	404.122	-3	350	404.122	0	350	404.122	1
351	404.134	5	351	404.134	9	351	404.134	5
352	404.145	3	352	404.145	5	352	404.145	3
353	404.157	-1	353	404.157	4	353	404.157	3
354	404.169	-4	354	404.169	2	354	404.169	1
355	404.181	5	355	404.181	8	355	404.181	5
356	404.193	5	356	404.193	4	356	404.193	2
357	404.204	-2	357	404.204	3	357	404.204	3
358	404.216	-2	358	404.216	1	358	404.216	2
359	404.228	5	359	404.228	10	359	404.228	6
360	404.24	4	360	404.24	5	360	404.24	2
361	404.252	-1	361	404.252	3	361	404.252	3
362	404.264	-2	362	404.264	2	362	404.264	1
363	404.275	5	363	404.275	8	363	404.275	5
364	404.287	4	364	404.287	6	364	404.287	2
365	404.299	0	365	404.299	5	365	404.299	5
366	404.311	-2	366	404.311	3	366	404.311	2
367	404.323	7	367	404.323	8	367	404.323	6
368	404.335	5	368	404.335	7	368	404.335	3
369	404.346	1	369	404.346	5	369	404.346	6
370	404.358	2	370	404.358	5	370	404.358	4
371	404.37	8	371	404.37	10	371	404.37	8
372	404.382	9	372	404.382	8	372	404.382	5
373	404.394	4	373	404.394	7	373	404.394	7
374	404.406	5	374	404.406	6	374	404.406	5
375	404.417	10	375	404.417	13	375	404.417	7
376	404.429	9	376	404.429	10	376	404.429	6
377	404.441	5	377	404.441	10	377	404.441	10
378	404.453	5	378	404.453	7	378	404.453	5
379	404.465	9	379	404.465	14	379	404.465	8
380	404.476	9	380	404.476	11	380	404.476	7
381	404.488	3	381	404.488	9	381	404.488	10
382	404.5	3	382	404.5	5	382	404.5	6
383	404.512	6	383	404.512	11	383	404.512	9
384	404.524	7	384	404.524	8	384	404.524	7
385	404.536	2	385	404.536	8	385	404.536	8
386	404.548	3	386	404.548	5	386	404.548	5
387	404.559	5	387	404.559	9	387	404.559	8
388	404.571	5	388	404.571	8	388	404.571	7
389	404.583	2	389	404.583	8	389	404.583	8
390	404.595	1	390	404.595	5	390	404.595	5
391	404.607	5	391	404.607	9	391	404.607	8
392	404.618	5	392	404.618	6	392	404.618	8
393	404.63	3	393	404.63	8	393	404.63	8
394	404.642	1	394	404.642	4	394	404.642	5
395	404.654	4	395	404.654	9	395	404.654	7
396	404.666	5	396	404.666	6	396	404.666	7
397	404.678	4	397	404.678	8	397	404.678	7
398	404.69	1	398	404.69	4	398	404.69	6
399	404.701	4	399	404.701	9	399	404.701	7
400	404.713	5	400	404.713	5	400	404.713	7
401	404.725	2	401	404.725	8	401	404.725	6
402	404.737	2	402	404.737	4	402	404.737	8
403	404.749	6	403	404.749	10	403	404.749	5
404	404.76	4	404	404.76	3	404	404.76	6
405	404.772	2	405	404.772	7	405	404.772	6
406	404.784	3	406	404.784	2	406	404.784	6
407	404.796	3	407	404.796	10	407	404.796	5
408	404.808	4	408	404.808	2	408	404.808	3
409	404.82	3	409	404.82	5	409	404.82	6
410	404.832	3	410	404.832	1	410	404.832	5
411	404.843	3	411	404.843	9	411	404.843	6
412	404.855	3	412	404.855	2	412	404.855	3
413	404.867	5	413	404.867	5	413	404.867	4
414	404.879	4	414	404.879	2	414	404.879	5
415	404.891	1	415	404.891	8	415	404.891	7
416	404.902	1	416	404.902	2	416	404.902	3
417	404.914	3	417	404.914	5	417	404.914	4
418	404.926	2	418	404.926	3	418	404.926	6
419	404.938	1	419	404.938	8	419	404.938	6
420	404.95	1	420	404.95	2	420	404.95	3
421	404.962	3	421	404.962	4	421	404.962	4
422	404.974	2	422	404.974	3	422	404.974	5
423	404.985	1	423	404.985	8	423	404.985	6
424	404.997	1	424	404.997	2	424	404.997	3
425	405.009	3	425	405.009	4	425	405.009	5
426	405.021	0	426	405.021	3	426	405.021	5
427	405.033	1	427	405.033	7	427	405.033	6
428	405.045	-1	428	405.045	1	428	405.045	4
429	405.056	3	429	405.056	3	429	405.056	5
430	405.068	1	430	405.068	3	430	405.068	4
431	405.08	0	431	405.08	5	431	405.08	5
432	405.092	-1	432	405.092	1	432	405.092	4
433	405.104	3	433	405.104	3	433	405.104	5
434	405.116	0	434	405.116	3	434	405.116	4
435	405.127	-1	435	405.127	3	435	405.127	3
436	405.139	0	436	405.139	1	436	405.139	5
437	405.151	1	437	405.151	2	437	405.151	6
438	405.163	1	438	405.163	4	438	405.163	4
439	405.175	-1	439	405.175	5	439	405.175	2
440	405.187	2	440	405.187	1	440	405.187	4
441	405.198	6	441	405.198	3	441	405.198	6
442	405.21	3	442	405.21	4	442	405.21	3
443	405.222	1	443	405.222	5	443	405.222	4
444	405.234	1	444	405.234	1	444	405.234	2
445	405.246	6	445	405.246	3	445	405.246	6
446	405.258	2	446	405.258	5	446	405.258	3
447	405.269	4	447	405.269	5	447	405.269	6
448	405.281	1	448	405.281	2	448	405.281	3
449	405.293	6	449	405.293	5	449	405.293	6
450	405.305	2	450	405.305	5	450	405.305	4
451	405.317	4	451	405.317	6	451	405.317	6
452	405.329	3	452	405.329	3	452	405.329	5
453	405.341	8	453	405.341	5	453	405.341	7
454	405.352	5	454	405.352	4	454	405.352	7
455	405.364	7	455	405.364	7	455	405.364	6
456	405.376	7	456	405.376	6	456	405.376	5
457	405.388	12	457	405.388	7	457	405.388	11
458	405.4	10	458	405.4	8	458	405.4	10
459	405.412	10	459	405.412	10	459	405.412	9
460	405.423	15	460	405.423	9	460	405.423	8
461	405.435	20	461	405.435	13	461	405.435	16
462	405.447	19	462	405.447	15	462	405.447	14
463	405.459	16	463	405.459	15	463	405.459	14
464	405.471	16	464	405.471	11	464	405.471	12
465	405.483	18	465	405.483	12	465	405.483	19
466	405.495	19	466	405.495	13	466	405.495	13
467	405.506	13	467	405.506	14	467	405.506	15
468	405.518	15	468	405.518	10	468	405.518	14
469	405.53	10	469	405.53	8	469	405.53	14
470	405.542	11	470	405.542	8	470	405.542	9
471	405.554	6	471	405.554	9	471	405.554	11
472	405.566	9	472	405.566	6	472	405.566	9
473	405.577	9	473	405.577	6	473	405.577	11
474	405.589	8	474	405.589	5	474	405.589	8
475	405.601	5	475	405.601	9	475	405.601	10
476	405.613	6	476	405.613	6	476	405.613	8
477	405.625	6	477	405.625	5	477	405.625	11
478	405.637	8	478	405.637	7	478	405.637	6
479	405.649	8	479	405.649	7	479	405.649	9
480	405.66	2	480	405.66	4	480	405.66	7
481	405.672	7	481	405.672	3	481	405.672	9
482	405.684	5	482	405.684	6	482	405.684	5
483	405.696	7	483	405.696	6	483	405.696	7
484	405.708	0	484	405.708	3	484	405.708	7
485	405.72	4	485	405.72	2	485	405.72	10
486	405.731	6	486	405.731	6	486	405.731	5
487	405.743	7	487	405.743	6	487	405.743	6
488	405.755	-2	488	405.755	4	488	405.755	7
489	405.767	5	489	405.767	2	489	405.767	10
490	405.779	5	490	405.779	6	490	405.779	6
491	405.791	7	491	405.791	6	491	405.791	6
492	405.803	0	492	405.803	4	492	405.803	6
493	405.814	5	493	405.814	1	493	405.814	8
494	405.826	7	494	405.826	6	494	405.826	4
495	405.838	9	495	405.838	2	495	405.838	8
496	405.85	0	496	405.85	4	496	405.85	8
497	405.862	5	497	405.862	1	497	405.862	8
498	405.874	6	498	405.874	6	498	405.874	4
499	405.885	7	499	405.885	3	499	405.885	8
500	405.897	-2	500	405.897	4	500	405.897	9
501	405.909	3	501	405.909	1	501	405.909	7
502	405.921	6	502	405.921	6	502	405.921	3
503	405.933	6	503	405.933	2	503	405.933	8
504	405.945	-1	504	405.945	4	504	405.945	7
505	405.957	3	505	405.957	1	505	405.957	7
506	405.968	6	506	405.968	6	506	405.968	3
507	405.98	7	507	405.98	2	507	405.98	8
508	405.992	-2	508	405.992	4	508	405.992	7
509	406.004	2	509	406.004	1	509	406.004	7
510	406.016	6	510	406.016	5	510	406.016	3
511	406.028	5	511	406.028	2	511	406.028	8
512	406.04	-2	512	406.04	3	512	406.04	7
513	406.051	2	513	406.051	1	513	406.051	8
514	406.063	5	514	406.063	4	514	406.063	2
515	406.075	6	515	406.075	2	515	406.075	7
516	406.087	-1	516	406.087	3	516	406.087	7
517	406.099	2	517	406.099	1	517	406.099	7
518	406.111	6	518	406.111	5	518	406.111	1
519	406.123	4	519	406.123	2	519	406.123	7
520	406.134	-2	520	406.134	3	520	406.134	7
521	406.146	2	521	406.146	0	521	406.146	8
522	406.158	6	522	406.158	5	522	406.158	2
523	406.17	5	523	406.17	2	523	406.17	8
524	406.182	1	524	406.182	3	524	406.182	7
525	406.194	4	525	406.194	1	525	406.194	4
526	406.205	6	526	406.205	5	526	406.205	2
527	406.217	6	527	406.217	2	527	406.217	9
528	406.229	2	528	406.229	4	528	406.229	9
529	406.241	3	529	406.241	1	529	406.241	4
530	406.253	5	530	406.253	3	530	406.253	2
531	406.265	7	531	406.265	5	531	406.265	7
532	406.277	2	532	406.277	4	532	406.277	7
533	406.288	3	533	406.288	3	533	406.288	4
534	406.3	4	534	406.3	4	534	406.3	2
535	406.312	7	535	406.312	4	535	406.312	6
536	406.324	2	536	406.324	5	536	406.324	8
537	406.336	5	537	406.336	4	537	406.336	4
538	406.348	3	538	406.348	3	538	406.348	4
539	406.36	8	539	406.36	5	539	406.36	7
540	406.372	1	540	406.372	7	540	406.372	8
541	406.383	3	541	406.383	3	541	406.383	5
542	406.395	4	542	406.395	3	542	406.395	4
543	406.407	5	543	406.407	7	543	406.407	6
544	406.419	2	544	406.419	6	544	406.419	7
545	406.431	4	545	406.431	4	545	406.431	6
546	406.443	4	546	406.443	4	546	406.443	5
547	406.454	6	547	406.454	9	547	406.454	7
548	406.466	4	548	406.466	6	548	406.466	7
549	406.478	5	549	406.478	5	549	406.478	7
550	406.49	4	550	406.49	5	550	406.49	5
551	406.502	6	551	406.502	8	551	406.502	7
552	406.514	4	552	406.514	8	552	406.514	7
553	406.526	4	553	406.526	4	553	406.526	6
554	406.538	4	554	406.538	4	554	406.538	4
555	406.549	3	555	406.549	7	555	406.549	7
556	406.561	2	556	406.561	7	556	406.561	7
557	406.573	4	557	406.573	4	557	406.573	7
558	406.585	5	558	406.585	6	558	406.585	5
559	406.597	7	559	406.597	6	559	406.597	8
560	406.609	3	560	406.609	7	560	406.609	7
561	406.62	4	561	406.62	3	561	406.62	7
562	406.632	3	562	406.632	6	562	406.632	4
563	406.644	6	563	406.644	5	563	406.644	9
564	406.656	2	564	406.656	8	564	406.656	6
565	406.668	2	565	406.668	2	565	406.668	6
566	406.68	3	566	406.68	4	566	406.68	3
567	406.692	5	567	406.692	6	567	406.692	7
568	406.704	3	568	406.704	7	568	406.704	6
569	406.715	3	569	406.715	2	569	406.715	6
570	406.727	2	570	406.727	4	570	406.727	3
571	406.739	4	571	406.739	6	571	406.739	8
572	406.751	4	572	406.751	6	572	406.751	5
573	406.763	3	573	406.763	2	573	406.763	5
574	406.775	1	574	406.775	4	574	406.775	1
575	406.787	3	575	406.787	5	575	406.787	8
576	406.798	4	576	406.798	5	576	406.798	6
577	406.81	3	577	406.81	3	577	406.81	5
578	406.822	2	578	406.822	3	578	406.822	1
579	406.834	4	579	406.834	5	579	406.834	6
580	406.846	3	580	406.846	6	580	406.846	6
581	406.858	2	581	406.858	2	581	406.858	5
582	406.87	1	582	406.87	3	582	406.87	2
583	406.882	3	583	406.882	5	583	406.882	7
584	406.893	3	584	406.893	6	584	406.893	6
585	406.905	1	585	406.905	2	585	406.905	6
586	406.917	1	586	406.917	3	586	406.917	1
587	406.929	1	587	406.929	5	587	406.929	7
588	406.941	2	588	406.941	6	588	406.941	6
589	406.953	4	589	406.953	2	589	406.953	6
590	406.965	2	590	406.965	2	590	406.965	5
591	406.976	1	591	406.976	5	591	406.976	6
592	406.988	1	592	406.988	5	592	406.988	6
593	407	3	593	407	2	593	407	5
594	407.012	2	594	407.012	2	594	407.012	4
595	407.024	1	595	407.024	4	595	407.024	6
596	407.036	1	596	407.036	4	596	407.036	5
597	407.048	4	597	407.048	2	597	407.048	4
598	407.06	2	598	407.06	2	598	407.06	3
599	407.071	-3	599	407.071	3	599	407.071	5
600	407.083	1	600	407.083	2	600	407.083	5
601	407.095	3	601	407.095	2	601	407.095	4
602	407.107	2	602	407.107	3	602	407.107	3
603	407.119	-4	603	407.119	2	603	407.119	5
604	407.131	-1	604	407.131	2	604	407.131	7
605	407.143	3	605	407.143	1	605	407.143	3
606	407.154	2	606	407.154	3	606	407.154	1
607	407.166	-3	607	407.166	0	607	407.166	7
608	407.178	1	608	407.178	1	608	407.178	5
609	407.19	5	609	407.19	3	609	407.19	4
610	407.202	3	610	407.202	5	610	407.202	1
611	407.214	-2	611	407.214	1	611	407.214	8
612	407.226	2	612	407.226	2	612	407.226	7
613	407.238	8	613	407.238	3	613	407.238	5
614	407.249	2	614	407.249	5	614	407.249	3
615	407.261	2	615	407.261	3	615	407.261	8
616	407.273	4	616	407.273	2	616	407.273	7
617	407.285	8	617	407.285	3	617	407.285	6
618	407.297	4	618	407.297	4	618	407.297	3
619	407.309	3	619	407.309	2	619	407.309	8
620	407.321	4	620	407.321	3	620	407.321	7
621	407.332	9	621	407.332	4	621	407.332	7
622	407.344	6	622	407.344	5	622	407.344	3
623	407.356	2	623	407.356	4	623	407.356	10
624	407.368	5	624	407.368	4	624	407.368	9
625	407.38	9	625	407.38	4	625	407.38	7
626	407.392	9	626	407.392	6	626	407.392	5
627	407.404	3	627	407.404	8	627	407.404	12
628	407.416	7	628	407.416	5	628	407.416	9
629	407.428	9	629	407.428	5	629	407.428	7
630	407.439	8	630	407.439	7	630	407.439	4
631	407.451	2	631	407.451	7	631	407.451	12
632	407.463	6	632	407.463	5	632	407.463	10
633	407.475	9	633	407.475	5	633	407.475	8
634	407.487	7	634	407.487	7	634	407.487	6
635	407.499	4	635	407.499	7	635	407.499	11
636	407.511	8	636	407.511	6	636	407.511	9
637	407.522	8	637	407.522	5	637	407.522	7
638	407.534	6	638	407.534	4	638	407.534	3
639	407.546	4	639	407.546	6	639	407.546	11
640	407.558	8	640	407.558	5	640	407.558	8
641	407.57	6	641	407.57	4	641	407.57	7
642	407.582	5	642	407.582	3	642	407.582	3
643	407.594	1	643	407.594	4	643	407.594	10
644	407.606	6	644	407.606	5	644	407.606	8
645	407.618	6	645	407.618	4	645	407.618	7
646	407.629	5	646	407.629	4	646	407.629	3
647	407.641	2	647	407.641	4	647	407.641	11
648	407.653	5	648	407.653	5	648	407.653	8
649	407.665	5	649	407.665	5	649	407.665	6
650	407.677	5	650	407.677	4	650	407.677	3
651	407.689	2	651	407.689	2	651	407.689	11
652	407.701	5	652	407.701	5	652	407.701	9
653	407.712	3	653	407.712	4	653	407.712	8
654	407.724	7	654	407.724	5	654	407.724	4
655	407.736	3	655	407.736	4	655	407.736	11
656	407.748	3	656	407.748	4	656	407.748	9
657	407.76	3	657	407.76	4	657	407.76	8
658	407.772	7	658	407.772	6	658	407.772	4
659	407.784	3	659	407.784	4	659	407.784	11
660	407.796	3	660	407.796	4	660	407.796	8
661	407.808	2	661	407.808	3	661	407.808	8
662	407.819	6	662	407.819	6	662	407.819	3
663	407.831	3	663	407.831	4	663	407.831	9
664	407.843	2	664	407.843	4	664	407.843	6
665	407.855	2	665	407.855	4	665	407.855	6
666	407.867	5	666	407.867	5	666	407.867	3
667	407.879	2	667	407.879	3	667	407.879	8
668	407.891	2	668	407.891	2	668	407.891	7
669	407.903	1	669	407.903	4	669	407.903	3
670	407.914	2	670	407.914	3	670	407.914	2
671	407.926	1	671	407.926	1	671	407.926	7
672	407.938	1	672	407.938	2	672	407.938	5
673	407.95	1	673	407.95	3	673	407.95	3
674	407.962	3	674	407.962	3	674	407.962	2
675	407.974	-1	675	407.974	1	675	407.974	7
676	407.986	2	676	407.986	2	676	407.986	4
677	407.998	1	677	407.998	3	677	407.998	3
678	408.01	1	678	408.01	3	678	408.01	2
679	408.021	-2	679	408.021	2	679	408.021	7
680	408.033	1	680	408.033	3	680	408.033	4
681	408.045	2	681	408.045	3	681	408.045	3
682	408.057	1	682	408.057	4	682	408.057	2
683	408.069	-2	683	408.069	2	683	408.069	7
684	408.081	1	684	408.081	1	684	408.081	4
685	408.093	3	685	408.093	3	685	408.093	5
686	408.104	0	686	408.104	5	686	408.104	4
687	408.116	-4	687	408.116	3	687	408.116	8
688	408.128	2	688	408.128	1	688	408.128	3
689	408.14	2	689	408.14	2	689	408.14	4
690	408.152	0	690	408.152	3	690	408.152	3
691	408.164	-3	691	408.164	2	691	408.164	8
692	408.176	3	692	408.176	1	692	408.176	3
693	408.188	3	693	408.188	3	693	408.188	4
694	408.2	0	694	408.2	3	694	408.2	2
695	408.212	-2	695	408.212	2	695	408.212	8
696	408.223	3	696	408.223	3	696	408.223	2
697	408.235	1	697	408.235	4	697	408.235	4
698	408.247	1	698	408.247	4	698	408.247	3
699	408.259	-1	699	408.259	3	699	408.259	8
700	408.271	2	700	408.271	3	700	408.271	2
701	408.283	2	701	408.283	4	701	408.283	3
702	408.295	0	702	408.295	3	702	408.295	2
703	408.307	2	703	408.307	3	703	408.307	7
704	408.318	3	704	408.318	3	704	408.318	2
705	408.33	0	705	408.33	3	705	408.33	4
706	408.342	0	706	408.342	4	706	408.342	3
707	408.354	2	707	408.354	3	707	408.354	8
708	408.366	3	708	408.366	5	708	408.366	2
709	408.378	1	709	408.378	3	709	408.378	3
710	408.39	-1	710	408.39	3	710	408.39	3
711	408.402	2	711	408.402	4	711	408.402	9
712	408.414	4	712	408.414	4	712	408.414	3
713	408.425	2	713	408.425	4	713	408.425	4
714	408.437	-1	714	408.437	2	714	408.437	3
715	408.449	1	715	408.449	4	715	408.449	10
716	408.461	4	716	408.461	5	716	408.461	4
717	408.473	2	717	408.473	4	717	408.473	3
718	408.485	-1	718	408.485	3	718	408.485	3
719	408.497	0	719	408.497	4	719	408.497	10
720	408.509	3	720	408.509	5	720	408.509	3
721	408.521	0	721	408.521	4	721	408.521	3
722	408.532	0	722	408.532	3	722	408.532	3
723	408.544	-1	723	408.544	4	723	408.544	10
724	408.556	2	724	408.556	5	724	408.556	3
725	408.568	3	725	408.568	2	725	408.568	2
726	408.58	-2	726	408.58	4	726	408.58	1
727	408.592	-1	727	408.592	4	727	408.592	10
728	408.604	0	728	408.604	5	728	408.604	2
729	408.616	2	729	408.616	3	729	408.616	1
730	408.628	0	730	408.628	4	730	408.628	1
731	408.639	-2	731	408.639	5	731	408.639	9
732	408.651	1	732	408.651	4	732	408.651	2
733	408.663	2	733	408.663	4	733	408.663	0
734	408.675	0	734	408.675	5	734	408.675	3
735	408.687	-1	735	408.687	2	735	408.687	9
736	408.699	1	736	408.699	3	736	408.699	1
737	408.711	2	737	408.711	5	737	408.711	-1
738	408.723	-1	738	408.723	4	738	408.723	3
739	408.735	-2	739	408.735	2	739	408.735	9
740	408.747	1	740	408.747	1	740	408.747	1
741	408.758	2	741	408.758	4	741	408.758	-1
742	408.77	0	742	408.77	6	742	408.77	2
743	408.782	-1	743	408.782	2	743	408.782	8
744	408.794	3	744	408.794	2	744	408.794	0
745	408.806	2	745	408.806	3	745	408.806	-1
746	408.818	0	746	408.818	6	746	408.818	0
747	408.83	-1	747	408.83	1	747	408.83	10
748	408.842	1	748	408.842	3	748	408.842	-1
749	408.853	2	749	408.853	5	749	408.853	-1
750	408.865	-1	750	408.865	6	750	408.865	1
751	408.877	-1	751	408.877	1	751	408.877	8
752	408.889	1	752	408.889	3	752	408.889	-1
753	408.901	3	753	408.901	6	753	408.901	1
754	408.913	-2	754	408.913	7	754	408.913	1
755	408.925	-1	755	408.925	2	755	408.925	6
756	408.937	-1	756	408.937	4	756	408.937	-1
757	408.949	3	757	408.949	5	757	408.949	0
758	408.961	-2	758	408.961	7	758	408.961	1
759	408.972	-1	759	408.972	2	759	408.972	7
760	408.984	0	760	408.984	3	760	408.984	-1
761	408.996	2	761	408.996	4	761	408.996	0
762	409.008	-2	762	409.008	7	762	409.008	1
763	409.02	2	763	409.02	1	763	409.02	7
764	409.032	0	764	409.032	3	764	409.032	-2
765	409.044	1	765	409.044	5	765	409.044	0
766	409.056	-2	766	409.056	7	766	409.056	0
767	409.068	-1	767	409.068	2	767	409.068	6
768	409.079	-2	768	409.079	3	768	409.079	-1
769	409.091	2	769	409.091	4	769	409.091	0
770	409.103	0	770	409.103	6	770	409.103	1
771	409.115	0	771	409.115	2	771	409.115	7
772	409.127	-1	772	409.127	2	772	409.127	0
773	409.139	5	773	409.139	4	773	409.139	-1
774	409.151	0	774	409.151	7	774	409.151	0
775	409.163	1	775	409.163	4	775	409.163	7
776	409.175	0	776	409.175	3	776	409.175	0
777	409.187	6	777	409.187	4	777	409.187	-1
778	409.199	0	778	409.199	6	778	409.199	1
779	409.21	2	779	409.21	5	779	409.21	7
780	409.222	2	780	409.222	2	780	409.222	1
781	409.234	6	781	409.234	4	781	409.234	0
782	409.246	1	782	409.246	7	782	409.246	3
783	409.258	3	783	409.258	7	783	409.258	9
784	409.27	3	784	409.27	6	784	409.27	3
785	409.282	7	785	409.282	7	785	409.282	2
786	409.294	7	786	409.294	9	786	409.294	8
787	409.306	6	787	409.306	10	787	409.306	14
788	409.317	9	788	409.317	10	788	409.317	10
789	409.329	11	789	409.329	9	789	409.329	7
790	409.341	9	790	409.341	12	790	409.341	8
791	409.353	9	791	409.353	12	791	409.353	16
792	409.365	10	792	409.365	13	792	409.365	14
793	409.377	15	793	409.377	16	793	409.377	13
794	409.389	13	794	409.389	18	794	409.389	13
795	409.401	13	795	409.401	16	795	409.401	24
796	409.413	13	796	409.413	19	796	409.413	17
797	409.425	15	797	409.425	14	797	409.425	13
798	409.437	12	798	409.437	15	798	409.437	16
799	409.448	11	799	409.448	10	799	409.448	18
800	409.46	14	800	409.46	16	800	409.46	12
801	409.472	19	801	409.472	17	801	409.472	14
802	409.484	16	802	409.484	18	802	409.484	17
803	409.496	12	803	409.496	13	803	409.496	21
804	409.508	12	804	409.508	15	804	409.508	14
805	409.52	21	805	409.52	20	805	409.52	18
806	409.532	12	806	409.532	17	806	409.532	19
807	409.544	10	807	409.544	13	807	409.544	23
808	409.555	13	808	409.555	17	808	409.555	15
809	409.567	15	809	409.567	17	809	409.567	16
810	409.579	10	810	409.579	16	810	409.579	17
811	409.591	8	811	409.591	11	811	409.591	19
812	409.603	9	812	409.603	14	812	409.603	13
813	409.615	15	813	409.615	17	813	409.615	15
814	409.627	10	814	409.627	15	814	409.627	16
815	409.639	9	815	409.639	13	815	409.639	19
816	409.651	10	816	409.651	14	816	409.651	13
817	409.663	14	817	409.663	13	817	409.663	12
818	409.675	9	818	409.675	13	818	409.675	13
819	409.687	9	819	409.687	10	819	409.687	17
820	409.698	9	820	409.698	13	820	409.698	11
821	409.71	10	821	409.71	11	821	409.71	8
822	409.722	7	822	409.722	12	822	409.722	10
823	409.734	9	823	409.734	9	823	409.734	14
824	409.746	7	824	409.746	11	824	409.746	8
825	409.758	10	825	409.758	10	825	409.758	7
826	409.77	4	826	409.77	9	826	409.77	9
827	409.782	8	827	409.782	8	827	409.782	13
828	409.794	6	828	409.794	9	828	409.794	7
829	409.805	8	829	409.805	8	829	409.805	6
830	409.817	2	830	409.817	7	830	409.817	8
831	409.829	7	831	409.829	5	831	409.829	13
832	409.841	6	832	409.841	9	832	409.841	6
833	409.853	7	833	409.853	7	833	409.853	6
834	409.865	2	834	409.865	7	834	409.865	7
835	409.877	8	835	409.877	3	835	409.877	11
836	409.889	5	836	409.889	8	836	409.889	5
837	409.901	6	837	409.901	7	837	409.901	5
838	409.913	4	838	409.913	7	838	409.913	7
839	409.925	8	839	409.925	5	839	409.925	12
840	409.937	7	840	409.937	9	840	409.937	5
841	409.949	8	841	409.949	7	841	409.949	5
842	409.96	3	842	409.96	8	842	409.96	7
843	409.972	7	843	409.972	4	843	409.972	10
844	409.984	6	844	409.984	10	844	409.984	5
845	409.996	8	845	409.996	7	845	409.996	4
846	410.008	6	846	410.008	10	846	410.008	6
847	410.02	7	847	410.02	5	847	410.02	10
848	410.032	6	848	410.032	10	848	410.032	5
849	410.044	7	849	410.044	8	849	410.044	3
850	410.056	6	850	410.056	9	850	410.056	6
851	410.068	5	851	410.068	6	851	410.068	11
852	410.079	6	852	410.079	10	852	410.079	4
853	410.091	8	853	410.091	4	853	410.091	2
854	410.103	4	854	410.103	7	854	410.103	7
855	410.115	7	855	410.115	3	855	410.115	10
856	410.127	6	856	410.127	7	856	410.127	3
857	410.139	6	857	410.139	5	857	410.139	2
858	410.151	2	858	410.151	7	858	410.151	7
859	410.163	7	859	410.163	3	859	410.163	9
860	410.175	8	860	410.175	8	860	410.175	3
861	410.187	4	861	410.187	5	861	410.187	1
862	410.199	3	862	410.199	4	862	410.199	6
863	410.211	6	863	410.211	5	863	410.211	8
864	410.222	6	864	410.222	7	864	410.222	1
865	410.234	5	865	410.234	5	865	410.234	2
866	410.246	3	866	410.246	5	866	410.246	7
867	410.258	7	867	410.258	7	867	410.258	10
868	410.27	5	868	410.27	7	868	410.27	2
869	410.282	6	869	410.282	8	869	410.282	4
870	410.294	4	870	410.294	6	870	410.294	8
871	410.306	9	871	410.306	8	871	410.306	12
872	410.318	5	872	410.318	8	872	410.318	3
873	410.33	6	873	410.33	8	873	410.33	4
874	410.342	5	874	410.342	7	874	410.342	11
875	410.353	8	875	410.353	9	875	410.353	13
876	410.365	7	876	410.365	8	876	410.365	5
877	410.377	7	877	410.377	10	877	410.377	6
878	410.389	6	878	410.389	10	878	410.389	13
879	410.401	10	879	410.401	11	879	410.401	17
880	410.413	8	880	410.413	9	880	410.413	7
881	410.425	8	881	410.425	11	881	410.425	8
882	410.437	6	882	410.437	9	882	410.437	11
883	410.449	10	883	410.449	10	883	410.449	15
884	410.461	9	884	410.461	10	884	410.461	7
885	410.473	8	885	410.473	10	885	410.473	6
886	410.485	6	886	410.485	8	886	410.485	12
887	410.497	10	887	410.497	10	887	410.497	14
888	410.508	7	888	410.508	9	888	410.508	6
889	410.52	7	889	410.52	11	889	410.52	7
890	410.532	6	890	410.532	7	890	410.532	11
891	410.544	9	891	410.544	9	891	410.544	13
892	410.556	8	892	410.556	8	892	410.556	4
893	410.568	6	893	410.568	10	893	410.568	6
894	410.58	5	894	410.58	6	894	410.58	8
895	410.592	11	895	410.592	7	895	410.592	12
896	410.604	6	896	410.604	8	896	410.604	3
897	410.616	4	897	410.616	8	897	410.616	3
898	410.628	6	898	410.628	5	898	410.628	6
899	410.639	10	899	410.639	4	899	410.639	12
900	410.651	4	900	410.651	7	900	410.651	1
901	410.663	5	901	410.663	8	901	410.663	4
902	410.675	6	902	410.675	4	902	410.675	6
903	410.687	9	903	410.687	3	903	410.687	11
904	410.699	5	904	410.699	6	904	410.699	1
905	410.711	3	905	410.711	7	905	410.711	4
906	410.723	6	906	410.723	4	906	410.723	6
907	410.735	8	907	410.735	4	907	410.735	12
908	410.747	2	908	410.747	7	908	410.747	3
909	410.759	3	909	410.759	7	909	410.759	4
910	410.771	6	910	410.771	3	910	410.771	8
911	410.783	7	911	410.783	4	911	410.783	13
912	410.795	2	912	410.795	7	912	410.795	3
913	410.806	4	913	410.806	7	913	410.806	4
914	410.818	2	914	410.818	3	914	410.818	6
915	410.83	8	915	410.83	5	915	410.83	13
916	410.842	2	916	410.842	7	916	410.842	3
917	410.854	4	917	410.854	5	917	410.854	5
918	410.866	2	918	410.866	3	918	410.866	5
919	410.878	7	919	410.878	2	919	410.878	12
920	410.89	0	920	410.89	5	920	410.89	3
921	410.902	2	921	410.902	4	921	410.902	4
922	410.914	3	922	410.914	2	922	410.914	5
923	410.926	6	923	410.926	2	923	410.926	11
924	410.938	1	924	410.938	5	924	410.938	3
925	410.95	2	925	410.95	5	925	410.95	3
926	410.961	2	926	410.961	1	926	410.961	3
927	410.973	4	927	410.973	4	927	410.973	10
928	410.985	3	928	410.985	3	928	410.985	2
929	410.997	3	929	410.997	6	929	410.997	3
930	411.009	1	930	411.009	2	930	411.009	3
931	411.021	3	931	411.021	3	931	411.021	10
932	411.033	2	932	411.033	2	932	411.033	3
933	411.045	2	933	411.045	6	933	411.045	3
934	411.057	0	934	411.057	2	934	411.057	3
935	411.069	4	935	411.069	2	935	411.069	9
936	411.081	4	936	411.081	2	936	411.081	3
937	411.093	4	937	411.093	6	937	411.093	3
938	411.104	-1	938	411.104	2	938	411.104	3
939	411.116	3	939	411.116	3	939	411.116	8
940	411.128	1	940	411.128	2	940	411.128	4
941	411.14	2	941	411.14	6	941	411.14	4
942	411.152	1	942	411.152	4	942	411.152	4
943	411.164	4	943	411.164	3	943	411.164	9
944	411.176	2	944	411.176	4	944	411.176	4
945	411.188	4	945	411.188	7	945	411.188	4
946	411.2	3	946	411.2	5	946	411.2	3
947	411.212	7	947	411.212	3	947	411.212	9
948	411.224	2	948	411.224	4	948	411.224	5
949	411.236	3	949	411.236	7	949	411.236	4
950	411.248	2	950	411.248	5	950	411.248	3
951	411.26	6	951	411.26	3	951	411.26	10
952	411.272	1	952	411.272	3	952	411.272	6
953	411.283	3	953	411.283	7	953	411.283	4
954	411.295	3	954	411.295	6	954	411.295	3
955	411.307	8	955	411.307	5	955	411.307	12
956	411.319	5	956	411.319	5	956	411.319	5
957	411.331	6	957	411.331	7	957	411.331	5
958	411.343	4	958	411.343	6	958	411.343	4
959	411.355	9	959	411.355	5	959	411.355	12
960	411.367	7	960	411.367	5	960	411.367	5
961	411.379	9	961	411.379	9	961	411.379	4
962	411.391	7	962	411.391	8	962	411.391	5
963	411.403	13	963	411.403	6	963	411.403	12
964	411.415	9	964	411.415	5	964	411.415	7
965	411.427	8	965	411.427	11	965	411.427	6
966	411.438	8	966	411.438	10	966	411.438	7
967	411.45	12	967	411.45	8	967	411.45	15
968	411.462	8	968	411.462	7	968	411.462	9
969	411.474	9	969	411.474	13	969	411.474	8
970	411.486	8	970	411.486	9	970	411.486	9
971	411.498	12	971	411.498	6	971	411.498	16
972	411.51	8	972	411.51	7	972	411.51	10
973	411.522	8	973	411.522	12	973	411.522	8
974	411.534	9	974	411.534	10	974	411.534	11
975	411.546	11	975	411.546	9	975	411.546	17
976	411.558	9	976	411.558	7	976	411.558	10
977	411.57	5	977	411.57	10	977	411.57	7
978	411.582	7	978	411.582	9	978	411.582	11
979	411.594	10	979	411.594	7	979	411.594	17
980	411.606	8	980	411.606	6	980	411.606	8
981	411.618	2	981	411.618	8	981	411.618	3
982	411.629	4	982	411.629	6	982	411.629	6
983	411.641	7	983	411.641	4	983	411.641	13
984	411.653	5	984	411.653	5	984	411.653	5
985	411.665	3	985	411.665	7	985	411.665	3
986	411.677	2	986	411.677	6	986	411.677	6
987	411.689	6	987	411.689	4	987	411.689	13
988	411.701	3	988	411.701	5	988	411.701	5
989	411.713	1	989	411.713	6	989	411.713	4
990	411.725	3	990	411.725	5	990	411.725	5
991	411.737	5	991	411.737	1	991	411.737	12
992	411.749	2	992	411.749	2	992	411.749	6
993	411.761	2	993	411.761	6	993	411.761	3
994	411.773	2	994	411.773	5	994	411.773	3
995	411.785	4	995	411.785	0	995	411.785	11
996	411.796	1	996	411.796	1	996	411.796	4
997	411.808	1	997	411.808	7	997	411.808	3
998	411.82	2	998	411.82	4	998	411.82	4
999	411.832	5	999	411.832	0	999	411.832	10
1000	411.844	1	1000	411.844	1	1000	411.844	4
1001	411.856	2	1001	411.856	7	1001	411.856	2
1002	411.868	2	1002	411.868	4	1002	411.868	4
1003	411.88	5	1003	411.88	2	1003	411.88	11
1004	411.892	1	1004	411.892	1	1004	411.892	4
1005	411.904	3	1005	411.904	7	1005	411.904	4
1006	411.916	2	1006	411.916	4	1006	411.916	5
1007	411.928	5	1007	411.928	2	1007	411.928	7
1008	411.94	1	1008	411.94	1	1008	411.94	6
1009	411.952	3	1009	411.952	6	1009	411.952	3
1010	411.964	2	1010	411.964	4	1010	411.964	5
1011	411.976	5	1011	411.976	3	1011	411.976	7
1012	411.988	1	1012	411.988	1	1012	411.988	4
1013	412	1	1013	412	5	1013	412	3
1014	412.011	3	1014	412.011	3	1014	412.011	4
1015	412.023	4	1015	412.023	3	1015	412.023	7
1016	412.035	0	1016	412.035	2	1016	412.035	5
1017	412.047	2	1017	412.047	5	1017	412.047	2
1018	412.059	2	1018	412.059	4	1018	412.059	2
1019	412.071	3	1019	412.071	3	1019	412.071	8
1020	412.083	1	1020	412.083	1	1020	412.083	5
1021	412.095	0	1021	412.095	4	1021	412.095	2
1022	412.107	0	1022	412.107	5	1022	412.107	4
1023	412.119	3	1023	412.119	3	1023	412.119	6
1024	412.131	1	1024	412.131	1	1024	412.131	5
1025	412.143	0	1025	412.143	4	1025	412.143	2
1026	412.155	0	1026	412.155	4	1026	412.155	4
1027	412.167	2	1027	412.167	3	1027	412.167	7
1028	412.179	1	1028	412.179	2	1028	412.179	4
1029	412.19	1	1029	412.19	5	1029	412.19	2
1030	412.202	2	1030	412.202	6	1030	412.202	4
1031	412.214	1	1031	412.214	3	1031	412.214	8
1032	412.226	1	1032	412.226	3	1032	412.226	4
1033	412.238	0	1033	412.238	5	1033	412.238	3
1034	412.25	3	1034	412.25	5	1034	412.25	4
1035	412.262	1	1035	412.262	4	1035	412.262	8
1036	412.274	3	1036	412.274	2	1036	412.274	4
1037	412.286	2	1037	412.286	6	1037	412.286	3
1038	412.298	6	1038	412.298	5	1038	412.298	5
1039	412.31	2	1039	412.31	4	1039	412.31	8
1040	412.322	2	1040	412.322	4	1040	412.322	4
1041	412.334	2	1041	412.334	7	1041	412.334	3
1042	412.346	7	1042	412.346	5	1042	412.346	5
1043	412.358	4	1043	412.358	6	1043	412.358	7
1044	412.37	2	1044	412.37	4	1044	412.37	4
1045	412.382	1	1045	412.382	6	1045	412.382	4
1046	412.394	8	1046	412.394	6	1046	412.394	4
1047	412.406	2	1047	412.406	6	1047	412.406	8
1048	412.417	3	1048	412.417	3	1048	412.417	5
1049	412.429	3	1049	412.429	7	1049	412.429	4
1050	412.441	8	1050	412.441	5	1050	412.441	5
1051	412.453	3	1051	412.453	5	1051	412.453	7
1052	412.465	2	1052	412.465	4	1052	412.465	4
1053	412.477	-1	1053	412.477	6	1053	412.477	2
1054	412.489	4	1054	412.489	3	1054	412.489	4
1055	412.501	3	1055	412.501	2	1055	412.501	6
1056	412.513	0	1056	412.513	3	1056	412.513	6
1057	412.525	1	1057	412.525	6	1057	412.525	3
1058	412.537	5	1058	412.537	3	1058	412.537	3
1059	412.549	1	1059	412.549	2	1059	412.549	6
1060	412.561	-2	1060	412.561	4	1060	412.561	6
1061	412.573	0	1061	412.573	7	1061	412.573	3
1062	412.585	3	1062	412.585	2	1062	412.585	5
1063	412.597	2	1063	412.597	3	1063	412.597	6
1064	412.609	0	1064	412.609	4	1064	412.609	8
1065	412.62	-2	1065	412.62	6	1065	412.62	2
1066	412.632	3	1066	412.632	2	1066	412.632	5
1067	412.644	2	1067	412.644	2	1067	412.644	6
1068	412.656	0	1068	412.656	3	1068	412.656	7
1069	412.668	-2	1069	412.668	6	1069	412.668	3
1070	412.68	6	1070	412.68	4	1070	412.68	4
1071	412.692	0	1071	412.692	2	1071	412.692	4
1072	412.704	0	1072	412.704	2	1072	412.704	7
1073	412.716	-1	1073	412.716	6	1073	412.716	3
1074	412.728	7	1074	412.728	3	1074	412.728	3
1075	412.74	-1	1075	412.74	1	1075	412.74	4
1076	412.752	0	1076	412.752	1	1076	412.752	7
1077	412.764	-2	1077	412.764	6	1077	412.764	3
1078	412.776	5	1078	412.776	3	1078	412.776	3
1079	412.788	1	1079	412.788	0	1079	412.788	5
1080	412.8	0	1080	412.8	1	1080	412.8	8
1081	412.812	-1	1081	412.812	6	1081	412.812	2
1082	412.824	4	1082	412.824	3	1082	412.824	3
1083	412.836	3	1083	412.836	1	1083	412.836	4
1084	412.848	3	1084	412.848	1	1084	412.848	7
1085	412.86	-1	1085	412.86	6	1085	412.86	2
1086	412.872	4	1086	412.872	2	1086	412.872	4
1087	412.883	2	1087	412.883	1	1087	412.883	5
1088	412.895	1	1088	412.895	1	1088	412.895	7
1089	412.907	-2	1089	412.907	6	1089	412.907	1
1090	412.919	5	1090	412.919	3	1090	412.919	4
1091	412.931	2	1091	412.931	1	1091	412.931	5
1092	412.943	2	1092	412.943	1	1092	412.943	7
1093	412.955	-1	1093	412.955	7	1093	412.955	1
1094	412.967	5	1094	412.967	4	1094	412.967	4
1095	412.979	1	1095	412.979	1	1095	412.979	5
1096	412.991	1	1096	412.991	0	1096	412.991	7
1097	413.003	-1	1097	413.003	6	1097	413.003	1
1098	413.015	5	1098	413.015	3	1098	413.015	3
1099	413.027	0	1099	413.027	0	1099	413.027	5
1100	413.039	0	1100	413.039	-1	1100	413.039	7
1101	413.051	-3	1101	413.051	6	1101	413.051	3
1102	413.063	5	1102	413.063	4	1102	413.063	2
1103	413.075	1	1103	413.075	-1	1103	413.075	4
1104	413.087	-1	1104	413.087	-1	1104	413.087	7
1105	413.099	-5	1105	413.099	6	1105	413.099	3
1106	413.111	5	1106	413.111	4	1106	413.111	2
1107	413.123	0	1107	413.123	-1	1107	413.123	6
1108	413.135	0	1108	413.135	0	1108	413.135	8
1109	413.146	-5	1109	413.146	6	1109	413.146	1
1110	413.158	4	1110	413.158	1	1110	413.158	3
1111	413.17	0	1111	413.17	-3	1111	413.17	7
1112	413.182	-1	1112	413.182	3	1112	413.182	7
1113	413.194	-4	1113	413.194	6	1113	413.194	1
1114	413.206	5	1114	413.206	2	1114	413.206	2
1115	413.218	1	1115	413.218	-2	1115	413.218	7
1116	413.23	1	1116	413.23	4	1116	413.23	7
1117	413.242	-1	1117	413.242	7	1117	413.242	2
1118	413.254	5	1118	413.254	3	1118	413.254	4
1119	413.266	3	1119	413.266	-1	1119	413.266	5
1120	413.278	3	1120	413.278	4	1120	413.278	7
1121	413.29	-1	1121	413.29	6	1121	413.29	3
1122	413.302	6	1122	413.302	4	1122	413.302	4
1123	413.314	6	1123	413.314	0	1123	413.314	5
1124	413.326	2	1124	413.326	3	1124	413.326	6
1125	413.338	0	1125	413.338	7	1125	413.338	3
1126	413.35	7	1126	413.35	6	1126	413.35	5
1127	413.362	7	1127	413.362	2	1127	413.362	6
1128	413.374	5	1128	413.374	5	1128	413.374	8
1129	413.386	2	1129	413.386	9	1129	413.386	3
1130	413.398	7	1130	413.398	7	1130	413.398	4
1131	413.409	7	1131	413.409	3	1131	413.409	6
1132	413.421	6	1132	413.421	4	1132	413.421	9
1133	413.433	3	1133	413.433	11	1133	413.433	3
1134	413.445	11	1134	413.445	8	1134	413.445	8
1135	413.457	6	1135	413.457	7	1135	413.457	9
1136	413.469	5	1136	413.469	6	1136	413.469	10
1137	413.481	2	1137	413.481	10	1137	413.481	3
1138	413.493	9	1138	413.493	8	1138	413.493	6
1139	413.505	5	1139	413.505	6	1139	413.505	6
1140	413.517	6	1140	413.517	4	1140	413.517	11
1141	413.529	1	1141	413.529	10	1141	413.529	2
1142	413.541	7	1142	413.541	6	1142	413.541	7
1143	413.553	4	1143	413.553	5	1143	413.553	6
1144	413.565	3	1144	413.565	3	1144	413.565	10
1145	413.577	-2	1145	413.577	9	1145	413.577	2
1146	413.589	7	1146	413.589	7	1146	413.589	7
1147	413.601	5	1147	413.601	5	1147	413.601	7
1148	413.613	4	1148	413.613	3	1148	413.613	8
1149	413.625	-2	1149	413.625	8	1149	413.625	1
1150	413.637	4	1150	413.637	4	1150	413.637	6
1151	413.649	3	1151	413.649	2	1151	413.649	7
1152	413.661	2	1152	413.661	3	1152	413.661	8
1153	413.673	-3	1153	413.673	7	1153	413.673	1
1154	413.685	2	1154	413.685	4	1154	413.685	6
1155	413.697	2	1155	413.697	-1	1155	413.697	6
1156	413.709	3	1156	413.709	2	1156	413.709	7
1157	413.721	-2	1157	413.721	7	1157	413.721	1
1158	413.733	2	1158	413.733	4	1158	413.733	8
1159	413.745	3	1159	413.745	0	1159	413.745	7
1160	413.756	2	1160	413.756	1	1160	413.756	7
1161	413.768	-3	1161	413.768	7	1161	413.768	1
1162	413.78	2	1162	413.78	5	1162	413.78	6
1163	413.792	4	1163	413.792	2	1163	413.792	6
1164	413.804	2	1164	413.804	2	1164	413.804	8
1165	413.816	-2	1165	413.816	7	1165	413.816	1
1166	413.828	2	1166	413.828	5	1166	413.828	8
1167	413.84	5	1167	413.84	3	1167	413.84	5
1168	413.852	1	1168	413.852	2	1168	413.852	7
1169	413.864	-3	1169	413.864	7	1169	413.864	0
1170	413.876	3	1170	413.876	6	1170	413.876	8
1171	413.888	3	1171	413.888	3	1171	413.888	6
1172	413.9	0	1172	413.9	3	1172	413.9	7
1173	413.912	-3	1173	413.912	5	1173	413.912	1
1174	413.924	3	1174	413.924	5	1174	413.924	8
1175	413.936	4	1175	413.936	2	1175	413.936	6
1176	413.948	0	1176	413.948	1	1176	413.948	5
1177	413.96	-3	1177	413.96	5	1177	413.96	1
1178	413.972	2	1178	413.972	5	1178	413.972	7
1179	413.984	4	1179	413.984	1	1179	413.984	6
1180	413.996	-1	1180	413.996	0	1180	413.996	6
1181	414.008	-2	1181	414.008	5	1181	414.008	0
1182	414.02	2	1182	414.02	6	1182	414.02	5
1183	414.032	5	1183	414.032	0	1183	414.032	6
1184	414.044	-2	1184	414.044	1	1184	414.044	4
1185	414.056	-4	1185	414.056	5	1185	414.056	-1
1186	414.068	1	1186	414.068	3	1186	414.068	5
1187	414.079	5	1187	414.079	0	1187	414.079	5
1188	414.091	0	1188	414.091	1	1188	414.091	3
1189	414.103	-5	1189	414.103	6	1189	414.103	-1
1190	414.115	2	1190	414.115	5	1190	414.115	6
1191	414.127	5	1191	414.127	0	1191	414.127	6
1192	414.139	0	1192	414.139	2	1192	414.139	4
1193	414.151	-4	1193	414.151	6	1193	414.151	1
1194	414.163	4	1194	414.163	4	1194	414.163	4
1195	414.175	6	1195	414.175	0	1195	414.175	5
1196	414.187	0	1196	414.187	2	1196	414.187	3
1197	414.199	-3	1197	414.199	7	1197	414.199	0
1198	414.211	5	1198	414.211	3	1198	414.211	6
1199	414.223	6	1199	414.223	1	1199	414.223	5
1200	414.235	-1	1200	414.235	2	1200	414.235	5
1201	414.247	-3	1201	414.247	6	1201	414.247	-1
1202	414.259	5	1202	414.259	3	1202	414.259	5
1203	414.271	7	1203	414.271	2	1203	414.271	5
1204	414.283	-1	1204	414.283	1	1204	414.283	4
1205	414.295	-3	1205	414.295	7	1205	414.295	-1
1206	414.307	6	1206	414.307	3	1206	414.307	6
1207	414.319	6	1207	414.319	2	1207	414.319	5
1208	414.331	0	1208	414.331	2	1208	414.331	6
1209	414.343	-3	1209	414.343	6	1209	414.343	0
1210	414.355	8	1210	414.355	2	1210	414.355	6
1211	414.367	5	1211	414.367	3	1211	414.367	4
1212	414.379	-1	1212	414.379	3	1212	414.379	6
1213	414.391	-2	1213	414.391	6	1213	414.391	1
1214	414.403	8	1214	414.403	5	1214	414.403	6
1215	414.415	9	1215	414.415	2	1215	414.415	7
1216	414.427	2	1216	414.427	4	1216	414.427	6
1217	414.439	2	1217	414.439	8	1217	414.439	3
1218	414.451	10	1218	414.451	6	1218	414.451	8
1219	414.463	12	1219	414.463	2	1219	414.463	9
1220	414.475	4	1220	414.475	4	1220	414.475	7
1221	414.487	3	1221	414.487	10	1221	414.487	5
1222	414.499	10	1222	414.499	8	1222	414.499	10
1223	414.51	13	1223	414.51	4	1223	414.51	10
1224	414.522	5	1224	414.522	5	1224	414.522	9
1225	414.534	3	1225	414.534	10	1225	414.534	6
1226	414.546	8	1226	414.546	7	1226	414.546	11
1227	414.558	10	1227	414.558	5	1227	414.558	10
1228	414.57	3	1228	414.57	5	1228	414.57	8
1229	414.582	4	1229	414.582	12	1229	414.582	6
1230	414.594	9	1230	414.594	7	1230	414.594	12
1231	414.606	10	1231	414.606	6	1231	414.606	9
1232	414.618	1	1232	414.618	4	1232	414.618	8
1233	414.63	3	1233	414.63	11	1233	414.63	5
1234	414.642	7	1234	414.642	7	1234	414.642	10
1235	414.654	9	1235	414.654	4	1235	414.654	9
1236	414.666	2	1236	414.666	3	1236	414.666	7
1237	414.678	0	1237	414.678	8	1237	414.678	3
1238	414.69	5	1238	414.69	5	1238	414.69	6
1239	414.702	8	1239	414.702	2	1239	414.702	7
1240	414.714	2	1240	414.714	3	1240	414.714	5
1241	414.726	-1	1241	414.726	7	1241	414.726	4
1242	414.738	4	1242	414.738	3	1242	414.738	5
1243	414.75	6	1243	414.75	0	1243	414.75	5
1244	414.762	3	1244	414.762	3	1244	414.762	4
1245	414.774	-1	1245	414.774	7	1245	414.774	2
1246	414.786	3	1246	414.786	2	1246	414.786	3
1247	414.798	5	1247	414.798	0	1247	414.798	3
1248	414.81	3	1248	414.81	2	1248	414.81	2
1249	414.822	-1	1249	414.822	7	1249	414.822	0
1250	414.834	2	1250	414.834	3	1250	414.834	3
1251	414.846	4	1251	414.846	0	1251	414.846	2
1252	414.858	2	1252	414.858	2	1252	414.858	3
1253	414.87	-3	1253	414.87	7	1253	414.87	1
1254	414.882	4	1254	414.882	3	1254	414.882	4
1255	414.894	3	1255	414.894	1	1255	414.894	2
1256	414.906	0	1256	414.906	2	1256	414.906	3
1257	414.918	-4	1257	414.918	7	1257	414.918	2
1258	414.93	3	1258	414.93	4	1258	414.93	3
1259	414.942	2	1259	414.942	1	1259	414.942	2
1260	414.954	1	1260	414.954	1	1260	414.954	2
1261	414.966	-5	1261	414.966	6	1261	414.966	1
1262	414.978	1	1262	414.978	3	1262	414.978	4
1263	414.99	2	1263	414.99	1	1263	414.99	3
1264	415.002	-1	1264	415.002	1	1264	415.002	2
1265	415.014	-4	1265	415.014	5	1265	415.014	1
1266	415.026	1	1266	415.026	4	1266	415.026	3
1267	415.038	2	1267	415.038	-1	1267	415.038	2
1268	415.05	0	1268	415.05	2	1268	415.05	2
1269	415.062	-6	1269	415.062	5	1269	415.062	0
1270	415.074	1	1270	415.074	4	1270	415.074	3
1271	415.086	3	1271	415.086	0	1271	415.086	2
1272	415.098	0	1272	415.098	2	1272	415.098	2
1273	415.11	-6	1273	415.11	4	1273	415.11	2
1274	415.122	1	1274	415.122	4	1274	415.122	3
1275	415.134	2	1275	415.134	0	1275	415.134	1
1276	415.146	-1	1276	415.146	2	1276	415.146	3
1277	415.158	-4	1277	415.158	3	1277	415.158	2
1278	415.17	-1	1278	415.17	3	1278	415.17	2
1279	415.182	1	1279	415.182	0	1279	415.182	-2
1280	415.193	0	1280	415.193	1	1280	415.193	4
1281	415.205	-4	1281	415.205	4	1281	415.205	1
1282	415.217	-1	1282	415.217	4	1282	415.217	2
1283	415.229	1	1283	415.229	-1	1283	415.229	0
1284	415.241	0	1284	415.241	2	1284	415.241	2
1285	415.253	-2	1285	415.253	5	1285	415.253	1
1286	415.265	0	1286	415.265	4	1286	415.265	4
1287	415.277	2	1287	415.277	0	1287	415.277	1
1288	415.289	2	1288	415.289	2	1288	415.289	2
1289	415.301	-2	1289	415.301	6	1289	415.301	3
1290	415.313	1	1290	415.313	5	1290	415.313	3
1291	415.325	3	1291	415.325	0	1291	415.325	2
1292	415.337	2	1292	415.337	4	1292	415.337	3
1293	415.349	3	1293	415.349	8	1293	415.349	5
1294	415.361	5	1294	415.361	9	1294	415.361	7
1295	415.373	9	1295	415.373	4	1295	415.373	5
1296	415.385	11	1296	415.385	8	1296	415.385	6
1297	415.397	6	1297	415.397	11	1297	415.397	8
1298	415.409	12	1298	415.409	13	1298	415.409	10
1299	415.421	16	1299	415.421	9	1299	415.421	10
1300	415.433	17	1300	415.433	11	1300	415.433	10
1301	415.445	8	1301	415.445	13	1301	415.445	7
1302	415.457	12	1302	415.457	14	1302	415.457	9
1303	415.469	13	1303	415.469	8	1303	415.469	10
1304	415.481	13	1304	415.481	9	1304	415.481	8
1305	415.493	6	1305	415.493	15	1305	415.493	9
1306	415.505	9	1306	415.505	15	1306	415.505	10
1307	415.517	11	1307	415.517	8	1307	415.517	11
1308	415.529	11	1308	415.529	8	1308	415.529	11
1309	415.541	5	1309	415.541	12	1309	415.541	6
1310	415.553	4	1310	415.553	12	1310	415.553	8
1311	415.565	9	1311	415.565	2	1311	415.565	9
1312	415.577	7	1312	415.577	7	1312	415.577	6
1313	415.589	4	1313	415.589	10	1313	415.589	5
1314	415.601	4	1314	415.601	10	1314	415.601	7
1315	415.613	7	1315	415.613	1	1315	415.613	8
1316	415.625	7	1316	415.625	7	1316	415.625	5
1317	415.637	4	1317	415.637	11	1317	415.637	4
1318	415.649	3	1318	415.649	9	1318	415.649	7
1319	415.661	7	1319	415.661	1	1319	415.661	8
1320	415.673	5	1320	415.673	7	1320	415.673	5
1321	415.685	2	1321	415.685	10	1321	415.685	3
1322	415.697	1	1322	415.697	9	1322	415.697	6
1323	415.709	7	1323	415.709	1	1323	415.709	9
1324	415.721	5	1324	415.721	6	1324	415.721	4
1325	415.733	2	1325	415.733	11	1325	415.733	3
1326	415.745	0	1326	415.745	9	1326	415.745	9
1327	415.757	9	1327	415.757	1	1327	415.757	10
1328	415.769	7	1328	415.769	6	1328	415.769	4
1329	415.781	2	1329	415.781	10	1329	415.781	3
1330	415.793	2	1330	415.793	8	1330	415.793	8
1331	415.805	7	1331	415.805	1	1331	415.805	8
1332	415.817	7	1332	415.817	6	1332	415.817	4
1333	415.829	2	1333	415.829	9	1333	415.829	0
1334	415.841	1	1334	415.841	7	1334	415.841	8
1335	415.853	5	1335	415.853	0	1335	415.853	7
1336	415.865	7	1336	415.865	4	1336	415.865	3
1337	415.877	2	1337	415.877	9	1337	415.877	-1
1338	415.889	1	1338	415.889	6	1338	415.889	8
1339	415.901	5	1339	415.901	1	1339	415.901	8
1340	415.913	6	1340	415.913	5	1340	415.913	3
1341	415.925	0	1341	415.925	8	1341	415.925	-1
1342	415.937	-1	1342	415.937	5	1342	415.937	7
1343	415.949	5	1343	415.949	0	1343	415.949	8
1344	415.961	7	1344	415.961	4	1344	415.961	2
1345	415.973	0	1345	415.973	9	1345	415.973	0
1346	415.985	-1	1346	415.985	5	1346	415.985	6
1347	415.997	4	1347	415.997	-1	1347	415.997	7
1348	416.009	7	1348	416.009	5	1348	416.009	3
1349	416.021	-1	1349	416.021	8	1349	416.021	-1
1350	416.033	0	1350	416.033	5	1350	416.033	5
1351	416.045	4	1351	416.045	0	1351	416.045	6
1352	416.057	6	1352	416.057	4	1352	416.057	3
1353	416.069	0	1353	416.069	6	1353	416.069	-1
1354	416.081	0	1354	416.081	4	1354	416.081	6
1355	416.093	4	1355	416.093	0	1355	416.093	6
1356	416.105	7	1356	416.105	4	1356	416.105	3
1357	416.117	0	1357	416.117	7	1357	416.117	-1
1358	416.129	-1	1358	416.129	4	1358	416.129	5
1359	416.141	3	1359	416.141	0	1359	416.141	5
1360	416.153	6	1360	416.153	4	1360	416.153	4
1361	416.165	0	1361	416.165	7	1361	416.165	-1
1362	416.177	-1	1362	416.177	2	1362	416.177	6
1363	416.189	3	1363	416.189	1	1363	416.189	6
1364	416.201	5	1364	416.201	5	1364	416.201	3
1365	416.213	-2	1365	416.213	8	1365	416.213	-2
1366	416.225	-2	1366	416.225	3	1366	416.225	2
1367	416.237	3	1367	416.237	0	1367	416.237	4
1368	416.249	4	1368	416.249	4	1368	416.249	6
1369	416.261	-2	1369	416.261	9	1369	416.261	-2
1370	416.273	-2	1370	416.273	4	1370	416.273	3
1371	416.285	3	1371	416.285	1	1371	416.285	5
1372	416.297	4	1372	416.297	4	1372	416.297	6
1373	416.309	0	1373	416.309	7	1373	416.309	-2
1374	416.321	-1	1374	416.321	4	1374	416.321	4
1375	416.333	1	1375	416.333	1	1375	416.333	4
1376	416.345	4	1376	416.345	4	1376	416.345	5
1377	416.357	1	1377	416.357	7	1377	416.357	-1
1378	416.369	0	1378	416.369	5	1378	416.369	3
1379	416.381	3	1379	416.381	0	1379	416.381	5
1380	416.393	7	1380	416.393	4	1380	416.393	6
1381	416.405	4	1381	416.405	8	1381	416.405	0
1382	416.417	3	1382	416.417	6	1382	416.417	4
1383	416.429	5	1383	416.429	1	1383	416.429	7
1384	416.441	12	1384	416.441	7	1384	416.441	6
1385	416.453	3	1385	416.453	9	1385	416.453	2
1386	416.465	3	1386	416.465	7	1386	416.465	4
1387	416.477	2	1387	416.477	2	1387	416.477	7
1388	416.489	9	1388	416.489	7	1388	416.489	6
1389	416.501	3	1389	416.501	9	1389	416.501	3
1390	416.513	1	1390	416.513	9	1390	416.513	5
1391	416.525	3	1391	416.525	2	1391	416.525	7
1392	416.537	9	1392	416.537	7	1392	416.537	6
1393	416.549	1	1393	416.549	7	1393	416.549	3
1394	416.561	1	1394	416.561	8	1394	416.561	5
1395	416.573	1	1395	416.573	4	1395	416.573	5
1396	416.585	9	1396	416.585	7	1396	416.585	6
1397	416.597	2	1397	416.597	7	1397	416.597	4
1398	416.609	-1	1398	416.609	8	1398	416.609	4
1399	416.621	-1	1399	416.621	3	1399	416.621	5
1400	416.633	8	1400	416.633	5	1400	416.633	6
1401	416.645	-1	1401	416.645	7	1401	416.645	3
1402	416.657	-2	1402	416.657	7	1402	416.657	3
1403	416.669	-1	1403	416.669	3	1403	416.669	3
1404	416.681	8	1404	416.681	6	1404	416.681	5
1405	416.693	1	1405	416.693	6	1405	416.693	2
1406	416.705	-3	1406	416.705	6	1406	416.705	3
1407	416.717	-2	1407	416.717	1	1407	416.717	2
1408	416.729	7	1408	416.729	5	1408	416.729	4
1409	416.741	1	1409	416.741	7	1409	416.741	0
1410	416.753	-2	1410	416.753	6	1410	416.753	3
1411	416.765	-1	1411	416.765	2	1411	416.765	2
1412	416.777	8	1412	416.777	5	1412	416.777	3
1413	416.789	1	1413	416.789	7	1413	416.789	1
1414	416.801	-2	1414	416.801	5	1414	416.801	3
1415	416.813	-2	1415	416.813	2	1415	416.813	1
1416	416.825	7	1416	416.825	4	1416	416.825	4
1417	416.837	1	1417	416.837	5	1417	416.837	1
1418	416.849	-2	1418	416.849	6	1418	416.849	3
1419	416.861	-4	1419	416.861	3	1419	416.861	2
1420	416.873	6	1420	416.873	3	1420	416.873	4
1421	416.885	-1	1421	416.885	5	1421	416.885	1
1422	416.897	0	1422	416.897	5	1422	416.897	3
1423	416.909	-4	1423	416.909	0	1423	416.909	1
1424	416.921	7	1424	416.921	3	1424	416.921	3
1425	416.933	0	1425	416.933	5	1425	416.933	1
1426	416.945	0	1426	416.945	5	1426	416.945	3
1427	416.957	-2	1427	416.957	0	1427	416.957	2
1428	416.969	8	1428	416.969	6	1428	416.969	2
1429	416.981	2	1429	416.981	6	1429	416.981	0
1430	416.993	1	1430	416.993	4	1430	416.993	3
1431	417.005	-3	1431	417.005	1	1431	417.005	-2
1432	417.017	6	1432	417.017	4	1432	417.017	3
1433	417.029	3	1433	417.029	6	1433	417.029	0
1434	417.041	3	1434	417.041	5	1434	417.041	2
1435	417.053	-2	1435	417.053	1	1435	417.053	-2
1436	417.065	7	1436	417.065	3	1436	417.065	4
1437	417.077	3	1437	417.077	4	1437	417.077	0
1438	417.089	3	1438	417.089	5	1438	417.089	2
1439	417.101	-4	1439	417.101	1	1439	417.101	2
1440	417.113	2	1440	417.113	2	1440	417.113	5
1441	417.125	1	1441	417.125	4	1441	417.125	-1
1442	417.137	2	1442	417.137	4	1442	417.137	1
1443	417.149	-4	1443	417.149	3	1443	417.149	2
1444	417.161	2	1444	417.161	2	1444	417.161	4
1445	417.173	4	1445	417.173	3	1445	417.173	-1
1446	417.185	1	1446	417.185	3	1446	417.185	1
1447	417.197	-2	1447	417.197	3	1447	417.197	3
1448	417.209	4	1448	417.209	3	1448	417.209	5
1449	417.221	4	1449	417.221	5	1449	417.221	-1
1450	417.233	2	1450	417.233	4	1450	417.233	2
1451	417.245	-1	1451	417.245	2	1451	417.245	3
1452	417.257	5	1452	417.257	5	1452	417.257	4
1453	417.269	3	1453	417.269	4	1453	417.269	-1
1454	417.281	1	1454	417.281	3	1454	417.281	2
1455	417.294	4	1455	417.294	2	1455	417.294	2
1456	417.306	11	1456	417.306	9	1456	417.306	7
1457	417.318	13	1457	417.318	10	1457	417.318	2
1458	417.33	23	1458	417.33	14	1458	417.33	9
1459	417.342	29	1459	417.342	18	1459	417.342	11
1460	417.354	48	1460	417.354	30	1460	417.354	20
1461	417.366	48	1461	417.366	26	1461	417.366	12
1462	417.378	61	1462	417.378	30	1462	417.378	19
1463	417.39	71	1463	417.39	37	1463	417.39	25
1464	417.402	70	1464	417.402	48	1464	417.402	30
1465	417.414	80	1465	417.414	51	1465	417.414	29
1466	417.426	77	1466	417.426	53	1466	417.426	39
1467	417.438	74	1467	417.438	57	1467	417.438	43
1468	417.45	73	1468	417.45	60	1468	417.45	44
1469	417.462	60	1469	417.462	47	1469	417.462	33
1470	417.474	53	1470	417.474	39	1470	417.474	34
1471	417.486	45	1471	417.486	43	1471	417.486	40
1472	417.498	51	1472	417.498	45	1472	417.498	39
1473	417.51	47	1473	417.51	41	1473	417.51	29
1474	417.522	41	1474	417.522	32	1474	417.522	31
1475	417.534	34	1475	417.534	34	1475	417.534	33
1476	417.546	43	1476	417.546	37	1476	417.546	34
1477	417.558	40	1477	417.558	38	1477	417.558	28
1478	417.57	35	1478	417.57	32	1478	417.57	32
1479	417.582	32	1479	417.582	34	1479	417.582	33
1480	417.594	40	1480	417.594	38	1480	417.594	33
1481	417.606	34	1481	417.606	32	1481	417.606	25
1482	417.618	30	1482	417.618	28	1482	417.618	29
1483	417.63	25	1483	417.63	29	1483	417.63	29
1484	417.642	35	1484	417.642	32	1484	417.642	29
1485	417.654	33	1485	417.654	31	1485	417.654	24
1486	417.666	28	1486	417.666	27	1486	417.666	28
1487	417.678	24	1487	417.678	27	1487	417.678	27
1488	417.69	33	1488	417.69	31	1488	417.69	27
1489	417.702	28	1489	417.702	27	1489	417.702	19
1490	417.714	25	1490	417.714	22	1490	417.714	23
1491	417.726	21	1491	417.726	22	1491	417.726	26
1492	417.738	28	1492	417.738	27	1492	417.738	22
1493	417.75	15	1493	417.75	15	1493	417.75	9
1494	417.762	14	1494	417.762	15	1494	417.762	15
1495	417.774	15	1495	417.774	15	1495	417.774	17
1496	417.786	18	1496	417.786	17	1496	417.786	13
1497	417.798	14	1497	417.798	12	1497	417.798	7
1498	417.81	11	1498	417.81	13	1498	417.81	13
1499	417.822	12	1499	417.822	13	1499	417.822	15
1500	417.834	16	1500	417.834	16	1500	417.834	10
1501	417.846	10	1501	417.846	8	1501	417.846	4
1502	417.858	8	1502	417.858	10	1502	417.858	9
1503	417.87	7	1503	417.87	9	1503	417.87	8
1504	417.882	11	1504	417.882	10	1504	417.882	8
1505	417.895	7	1505	417.895	7	1505	417.895	3
1506	417.907	7	1506	417.907	9	1506	417.907	9
1507	417.919	8	1507	417.919	8	1507	417.919	8
1508	417.931	12	1508	417.931	10	1508	417.931	6
1509	417.943	8	1509	417.943	7	1509	417.943	3
1510	417.955	7	1510	417.955	9	1510	417.955	9
1511	417.967	9	1511	417.967	9	1511	417.967	6
1512	417.979	11	1512	417.979	9	1512	417.979	7
1513	417.991	7	1513	417.991	7	1513	417.991	2
1514	418.003	6	1514	418.003	9	1514	418.003	10
1515	418.015	9	1515	418.015	9	1515	418.015	8
1516	418.027	11	1516	418.027	8	1516	418.027	6
1517	418.039	6	1517	418.039	8	1517	418.039	2
1518	418.051	5	1518	418.051	8	1518	418.051	10
1519	418.063	8	1519	418.063	7	1519	418.063	10
1520	418.075	10	1520	418.075	9	1520	418.075	7
1521	418.087	7	1521	418.087	9	1521	418.087	1
1522	418.099	5	1522	418.099	8	1522	418.099	9
1523	418.111	9	1523	418.111	6	1523	418.111	10
1524	418.123	11	1524	418.123	8	1524	418.123	6
1525	418.135	7	1525	418.135	8	1525	418.135	0
1526	418.147	3	1526	418.147	8	1526	418.147	9
1527	418.159	7	1527	418.159	6	1527	418.159	10
1528	418.171	9	1528	418.171	7	1528	418.171	6
1529	418.183	8	1529	418.183	7	1529	418.183	1
1530	418.195	4	1530	418.195	8	1530	418.195	8
1531	418.207	8	1531	418.207	6	1531	418.207	10
1532	418.219	9	1532	418.219	8	1532	418.219	7
1533	418.231	8	1533	418.231	6	1533	418.231	2
1534	418.243	4	1534	418.243	7	1534	418.243	8
1535	418.255	8	1535	418.255	6	1535	418.255	8
1536	418.267	10	1536	418.267	7	1536	418.267	6
1537	418.279	8	1537	418.279	6	1537	418.279	1
1538	418.291	3	1538	418.291	8	1538	418.291	8
1539	418.303	9	1539	418.303	6	1539	418.303	9
1540	418.315	12	1540	418.315	7	1540	418.315	7
1541	418.328	11	1541	418.328	8	1541	418.328	3
1542	418.34	9	1542	418.34	11	1542	418.34	9
1543	418.352	16	1543	418.352	10	1543	418.352	11
1544	418.364	21	1544	418.364	13	1544	418.364	9
1545	418.376	21	1545	418.376	13	1545	418.376	5
1546	418.388	18	1546	418.388	16	1546	418.388	12
1547	418.4	25	1547	418.4	14	1547	418.4	15
1548	418.412	28	1548	418.412	18	1548	418.412	12
1549	418.424	29	1549	418.424	21	1549	418.424	11
1550	418.436	21	1550	418.436	23	1550	418.436	18
1551	418.448	28	1551	418.448	18	1551	418.448	18
1552	418.46	29	1552	418.46	22	1552	418.46	16
1553	418.472	24	1553	418.472	21	1553	418.472	11
1554	418.484	17	1554	418.484	22	1554	418.484	17
1555	418.496	23	1555	418.496	16	1555	418.496	18
1556	418.508	23	1556	418.508	19	1556	418.508	14
1557	418.52	17	1557	418.52	14	1557	418.52	7
1558	418.532	9	1558	418.532	15	1558	418.532	11
1559	418.544	15	1559	418.544	10	1559	418.544	14
1560	418.556	16	1560	418.556	13	1560	418.556	10
1561	418.568	16	1561	418.568	13	1561	418.568	6
1562	418.58	6	1562	418.58	14	1562	418.58	9
1563	418.592	13	1563	418.592	9	1563	418.592	13
1564	418.604	15	1564	418.604	12	1564	418.604	10
1565	418.616	10	1565	418.616	10	1565	418.616	5
1566	418.628	4	1566	418.628	11	1566	418.628	6
1567	418.64	7	1567	418.64	5	1567	418.64	9
1568	418.652	10	1568	418.652	8	1568	418.652	10
1569	418.664	8	1569	418.664	9	1569	418.664	3
1570	418.676	3	1570	418.676	9	1570	418.676	6
1571	418.689	5	1571	418.689	5	1571	418.689	7
1572	418.701	11	1572	418.701	5	1572	418.701	8
1573	418.713	8	1573	418.713	10	1573	418.713	4
1574	418.725	2	1574	418.725	8	1574	418.725	6
1575	418.737	6	1575	418.737	4	1575	418.737	7
1576	418.749	11	1576	418.749	5	1576	418.749	7
1577	418.761	7	1577	418.761	9	1577	418.761	3
1578	418.773	2	1578	418.773	9	1578	418.773	7
1579	418.785	4	1579	418.785	5	1579	418.785	7
1580	418.797	11	1580	418.797	6	1580	418.797	6
1581	418.809	8	1581	418.809	9	1581	418.809	2
1582	418.821	5	1582	418.821	8	1582	418.821	5
1583	418.833	5	1583	418.833	3	1583	418.833	7
1584	418.845	10	1584	418.845	8	1584	418.845	6
1585	418.857	8	1585	418.857	9	1585	418.857	1
1586	418.869	4	1586	418.869	8	1586	418.869	5
1587	418.881	5	1587	418.881	5	1587	418.881	7
1588	418.893	11	1588	418.893	8	1588	418.893	7
1589	418.905	6	1589	418.905	8	1589	418.905	3
1590	418.917	6	1590	418.917	7	1590	418.917	5
1591	418.929	4	1591	418.929	4	1591	418.929	9
1592	418.941	10	1592	418.941	7	1592	418.941	6
1593	418.953	7	1593	418.953	8	1593	418.953	3
1594	418.965	6	1594	418.965	8	1594	418.965	4
1595	418.978	4	1595	418.978	3	1595	418.978	6
1596	418.99	9	1596	418.99	7	1596	418.99	6
1597	419.002	6	1597	419.002	7	1597	419.002	3
1598	419.014	2	1598	419.014	7	1598	419.014	5
1599	419.026	4	1599	419.026	2	1599	419.026	5
1600	419.038	8	1600	419.038	6	1600	419.038	5
1601	419.05	5	1601	419.05	7	1601	419.05	3
1602	419.062	0	1602	419.062	7	1602	419.062	3
1603	419.074	3	1603	419.074	2	1603	419.074	5
1604	419.086	8	1604	419.086	6	1604	419.086	4
1605	419.098	7	1605	419.098	6	1605	419.098	4
1606	419.11	0	1606	419.11	7	1606	419.11	3
1607	419.122	4	1607	419.122	2	1607	419.122	4
1608	419.134	8	1608	419.134	6	1608	419.134	4
1609	419.146	5	1609	419.146	6	1609	419.146	4
1610	419.158	0	1610	419.158	7	1610	419.158	2
1611	419.17	3	1611	419.17	3	1611	419.17	6
1612	419.182	11	1612	419.182	6	1612	419.182	4
1613	419.194	3	1613	419.194	7	1613	419.194	4
1614	419.206	2	1614	419.206	8	1614	419.206	3
1615	419.218	8	1615	419.218	3	1615	419.218	6
1616	419.23	13	1616	419.23	4	1616	419.23	4
1617	419.242	5	1617	419.242	8	1617	419.242	4
1618	419.254	1	1618	419.254	7	1618	419.254	2
1619	419.267	9	1619	419.267	3	1619	419.267	6
1620	419.279	14	1620	419.279	4	1620	419.279	5
1621	419.291	2	1621	419.291	6	1621	419.291	4
1622	419.303	1	1622	419.303	6	1622	419.303	2
1623	419.315	11	1623	419.315	2	1623	419.315	7
1624	419.327	14	1624	419.327	7	1624	419.327	6
1625	419.339	19	1625	419.339	16	1625	419.339	10
1626	419.351	34	1626	419.351	22	1626	419.351	13
1627	419.363	53	1627	419.363	26	1627	419.363	27
1628	419.375	76	1628	419.375	41	1628	419.375	32
1629	419.387	72	1629	419.387	41	1629	419.387	31
1630	419.399	93	1630	419.399	50	1630	419.399	34
1631	419.411	109	1631	419.411	50	1631	419.411	39
1632	419.423	125	1632	419.423	70	1632	419.423	52
1633	419.435	134	1633	419.435	88	1633	419.435	69
1634	419.447	137	1634	419.447	96	1634	419.447	79
1635	419.459	133	1635	419.459	94	1635	419.459	81
1636	419.471	118	1636	419.471	94	1636	419.471	78
1637	419.483	141	1637	419.483	115	1637	419.483	104
1638	419.495	126	1638	419.495	109	1638	419.495	102
1639	419.507	121	1639	419.507	97	1639	419.507	97
1640	419.519	112	1640	419.519	101	1640	419.519	95
1641	419.531	100	1641	419.531	96	1641	419.531	93
1642	419.543	95	1642	419.543	89	1642	419.543	87
1643	419.556	92	1643	419.556	74	1643	419.556	80
1644	419.568	80	1644	419.568	78	1644	419.568	77
1645	419.58	92	1645	419.58	94	1645	419.58	97
1646	419.592	92	1646	419.592	91	1646	419.592	92
1647	419.604	89	1647	419.604	78	1647	419.604	88
1648	419.616	81	1648	419.616	78	1648	419.616	78
1649	419.628	77	1649	419.628	78	1649	419.628	80
1650	419.64	72	1650	419.64	73	1650	419.64	76
1651	419.652	71	1651	419.652	61	1651	419.652	70
1652	419.664	69	1652	419.664	69	1652	419.664	68
1653	419.676	57	1653	419.676	57	1653	419.676	60
1654	419.688	57	1654	419.688	59	1654	419.688	58
1655	419.7	58	1655	419.7	50	1655	419.7	56
1656	419.712	52	1656	419.712	52	1656	419.712	52
1657	419.724	47	1657	419.724	49	1657	419.724	50
1658	419.736	50	1658	419.736	51	1658	419.736	51
1659	419.748	55	1659	419.748	44	1659	419.748	52
1660	419.76	47	1660	419.76	45	1660	419.76	44
1661	419.772	36	1661	419.772	38	1661	419.772	40
1662	419.784	33	1662	419.784	38	1662	419.784	35
1663	419.797	43	1663	419.797	34	1663	419.797	38
1664	419.809	38	1664	419.809	37	1664	419.809	34
1665	419.821	29	1665	419.821	31	1665	419.821	33
1666	419.833	27	1666	419.833	30	1666	419.833	27
1667	419.845	33	1667	419.845	26	1667	419.845	30
1668	419.857	32	1668	419.857	31	1668	419.857	28
1669	419.869	27	1669	419.869	29	1669	419.869	32
1670	419.881	26	1670	419.881	28	1670	419.881	25
1671	419.893	33	1671	419.893	25	1671	419.893	28
1672	419.905	31	1672	419.905	30	1672	419.905	27
1673	419.917	28	1673	419.917	28	1673	419.917	32
1674	419.929	23	1674	419.929	29	1674	419.929	24
1675	419.941	31	1675	419.941	24	1675	419.941	26
1676	419.953	30	1676	419.953	29	1676	419.953	26
1677	419.965	28	1677	419.965	30	1677	419.965	31
1678	419.977	24	1678	419.977	30	1678	419.977	23
1679	419.989	30	1679	419.989	24	1679	419.989	26
1680	420.002	29	1680	420.002	29	1680	420.002	26
1681	420.014	26	1681	420.014	29	1681	420.014	29
1682	420.026	24	1682	420.026	29	1682	420.026	22
1683	420.038	29	1683	420.038	24	1683	420.038	24
1684	420.05	28	1684	420.05	28	1684	420.05	24
1685	420.062	20	1685	420.062	22	1685	420.062	23
1686	420.074	19	1686	420.074	23	1686	420.074	17
1687	420.086	24	1687	420.086	17	1687	420.086	17
1688	420.098	23	1688	420.098	23	1688	420.098	19
1689	420.11	17	1689	420.11	20	1689	420.11	21
1690	420.122	16	1690	420.122	20	1690	420.122	14
1691	420.134	22	1691	420.134	16	1691	420.134	19
1692	420.146	23	1692	420.146	22	1692	420.146	19
1693	420.158	13	1693	420.158	18	1693	420.158	18
1694	420.17	12	1694	420.17	17	1694	420.17	12
1695	420.182	15	1695	420.182	12	1695	420.182	12
1696	420.194	19	1696	420.194	18	1696	420.194	16
1697	420.206	13	1697	420.206	17	1697	420.206	17
1698	420.219	12	1698	420.219	18	1698	420.219	11
1699	420.231	14	1699	420.231	13	1699	420.231	11
1700	420.243	18	1700	420.243	15	1700	420.243	13
1701	420.255	14	1701	420.255	17	1701	420.255	17
1702	420.267	13	1702	420.267	19	1702	420.267	11
1703	420.279	15	1703	420.279	13	1703	420.279	11
1704	420.291	18	1704	420.291	15	1704	420.291	14
1705	420.303	17	1705	420.303	16	1705	420.303	16
1706	420.315	15	1706	420.315	17	1706	420.315	12
1707	420.327	17	1707	420.327	12	1707	420.327	11
1708	420.339	20	1708	420.339	16	1708	420.339	16
1709	420.351	24	1709	420.351	22	1709	420.351	19
1710	420.363	31	1710	420.363	22	1710	420.363	15
1711	420.375	35	1711	420.375	24	1711	420.375	19
1712	420.387	39	1712	420.387	27	1712	420.387	25
1713	420.399	43	1713	420.399	30	1713	420.399	26
1714	420.411	51	1714	420.411	32	1714	420.411	23
1715	420.423	54	1715	420.423	35	1715	420.423	26
1716	420.436	57	1716	420.436	42	1716	420.436	36
1717	420.448	45	1717	420.448	40	1717	420.448	35
1718	420.46	50	1718	420.46	39	1718	420.46	33
1719	420.472	51	1719	420.472	37	1719	420.472	31
1720	420.484	43	1720	420.484	40	1720	420.484	37
1721	420.496	45	1721	420.496	43	1721	420.496	37
1722	420.508	43	1722	420.508	38	1722	420.508	35
1723	420.52	47	1723	420.52	39	1723	420.52	34
1724	420.532	40	1724	420.532	39	1724	420.532	37
1725	420.544	34	1725	420.544	35	1725	420.544	32
1726	420.556	28	1726	420.556	29	1726	420.556	26
1727	420.568	35	1727	420.568	29	1727	420.568	25
1728	420.58	31	1728	420.58	31	1728	420.58	30
1729	420.592	31	1729	420.592	31	1729	420.592	32
1730	420.604	23	1730	420.604	25	1730	420.604	24
1731	420.616	30	1731	420.616	24	1731	420.616	22
1732	420.629	26	1732	420.629	26	1732	420.629	27
1733	420.641	30	1733	420.641	29	1733	420.641	32
1734	420.653	22	1734	420.653	25	1734	420.653	23
1735	420.665	28	1735	420.665	24	1735	420.665	23
1736	420.677	27	1736	420.677	25	1736	420.677	25
1737	420.689	25	1737	420.689	28	1737	420.689	30
1738	420.701	20	1738	420.701	23	1738	420.701	21
1739	420.713	26	1739	420.713	23	1739	420.713	21
1740	420.725	24	1740	420.725	23	1740	420.725	23
1741	420.737	25	1741	420.737	27	1741	420.737	28
1742	420.749	20	1742	420.749	23	1742	420.749	19
1743	420.761	26	1743	420.761	22	1743	420.761	21
1744	420.773	23	1744	420.773	23	1744	420.773	22
1745	420.785	23	1745	420.785	25	1745	420.785	27
1746	420.798	19	1746	420.798	21	1746	420.798	18
1747	420.81	24	1747	420.81	20	1747	420.81	20
1748	420.822	22	1748	420.822	23	1748	420.822	21
1749	420.834	17	1749	420.834	19	1749	420.834	20
1750	420.846	16	1750	420.846	16	1750	420.846	15
1751	420.858	19	1751	420.858	15	1751	420.858	15
1752	420.87	17	1752	420.87	19	1752	420.87	16
1753	420.882	15	1753	420.882	19	1753	420.882	19
1754	420.894	15	1754	420.894	15	1754	420.894	13
1755	420.906	17	1755	420.906	14	1755	420.906	15
1756	420.918	17	1756	420.918	16	1756	420.918	15
1757	420.93	12	1757	420.93	15	1757	420.93	17
1758	420.942	11	1758	420.942	11	1758	420.942	12
1759	420.954	14	1759	420.954	12	1759	420.954	12
1760	420.966	13	1760	420.966	14	1760	420.966	13
1761	420.978	10	1761	420.978	14	1761	420.978	17
1762	420.991	12	1762	420.991	11	1762	420.991	10
1763	421.003	15	1763	421.003	11	1763	421.003	10
1764	421.015	12	1764	421.015	12	1764	421.015	13
1765	421.027	11	1765	421.027	14	1765	421.027	17
1766	421.039	14	1766	421.039	12	1766	421.039	9
1767	421.051	16	1767	421.051	11	1767	421.051	11
1768	421.063	11	1768	421.063	11	1768	421.063	13
1769	421.075	9	1769	421.075	12	1769	421.075	17
1770	421.087	13	1770	421.087	12	1770	421.087	10
1771	421.099	13	1771	421.099	10	1771	421.099	10
1772	421.111	11	1772	421.111	10	1772	421.111	11
1773	421.123	7	1773	421.123	14	1773	421.123	16
1774	421.135	12	1774	421.135	12	1774	421.135	9
1775	421.147	12	1775	421.147	11	1775	421.147	10
1776	421.159	11	1776	421.159	11	1776	421.159	10
1777	421.172	8	1777	421.172	13	1777	421.172	15
1778	421.184	13	1778	421.184	13	1778	421.184	9
1779	421.196	12	1779	421.196	11	1779	421.196	11
1780	421.208	14	1780	421.208	11	1780	421.208	11
1781	421.22	9	1781	421.22	13	1781	421.22	14
1782	421.232	14	1782	421.232	12	1782	421.232	10
1783	421.244	13	1783	421.244	11	1783	421.244	11
1784	421.256	15	1784	421.256	11	1784	421.256	12
1785	421.268	11	1785	421.268	13	1785	421.268	15
1786	421.28	15	1786	421.28	12	1786	421.28	10
1787	421.292	15	1787	421.292	12	1787	421.292	11
1788	421.304	15	1788	421.304	11	1788	421.304	11
1789	421.317	11	1789	421.317	11	1789	421.317	15
1790	421.329	13	1790	421.329	12	1790	421.329	8
1791	421.341	17	1791	421.341	14	1791	421.341	11
1792	421.353	18	1792	421.353	14	1792	421.353	12
1793	421.365	13	1793	421.365	14	1793	421.365	14
1794	421.377	14	1794	421.377	15	1794	421.377	8
1795	421.389	20	1795	421.389	14	1795	421.389	12
1796	421.401	23	1796	421.401	16	1796	421.401	14
1797	421.413	20	1797	421.413	18	1797	421.413	16
1798	421.425	22	1798	421.425	19	1798	421.425	10
1799	421.437	24	1799	421.437	18	1799	421.437	14
1800	421.449	26	1800	421.449	18	1800	421.449	15
1801	421.461	20	1801	421.461	20	1801	421.461	19
1802	421.474	22	1802	421.474	21	1802	421.474	13
1803	421.486	24	1803	421.486	18	1803	421.486	16
1804	421.498	25	1804	421.498	19	1804	421.498	15
1805	421.51	18	1805	421.51	22	1805	421.51	22
1806	421.522	22	1806	421.522	22	1806	421.522	13
1807	421.534	25	1807	421.534	20	1807	421.534	18
1808	421.546	23	1808	421.546	19	1808	421.546	17
1809	421.558	16	1809	421.558	20	1809	421.558	22
1810	421.57	18	1810	421.57	19	1810	421.57	12
1811	421.582	21	1811	421.582	18	1811	421.582	17
1812	421.594	20	1812	421.594	17	1812	421.594	17
1813	421.606	14	1813	421.606	14	1813	421.606	17
1814	421.618	12	1814	421.618	17	1814	421.618	9
1815	421.63	15	1815	421.63	15	1815	421.63	12
1816	421.642	17	1816	421.642	13	1816	421.642	13
1817	421.655	13	1817	421.655	14	1817	421.655	17
1818	421.667	13	1818	421.667	15	1818	421.667	7
1819	421.679	16	1819	421.679	14	1819	421.679	11
1820	421.691	16	1820	421.691	12	1820	421.691	12
1821	421.703	13	1821	421.703	11	1821	421.703	14
1822	421.715	10	1822	421.715	13	1822	421.715	5
1823	421.727	14	1823	421.727	14	1823	421.727	10
1824	421.739	10	1824	421.739	9	1824	421.739	10
1825	421.751	10	1825	421.751	9	1825	421.751	13
1826	421.763	9	1826	421.763	12	1826	421.763	4
1827	421.775	12	1827	421.775	13	1827	421.775	8
1828	421.788	8	1828	421.788	9	1828	421.788	9
1829	421.8	10	1829	421.8	11	1829	421.8	13
1830	421.812	10	1830	421.812	12	1830	421.812	4
1831	421.824	10	1831	421.824	13	1831	421.824	9
1832	421.836	8	1832	421.836	8	1832	421.836	9
1833	421.848	10	1833	421.848	10	1833	421.848	12
1834	421.86	8	1834	421.86	11	1834	421.86	4
1835	421.872	10	1835	421.872	11	1835	421.872	8
1836	421.884	9	1836	421.884	9	1836	421.884	8
1837	421.896	10	1837	421.896	11	1837	421.896	11
1838	421.908	8	1838	421.908	11	1838	421.908	4
1839	421.92	11	1839	421.92	13	1839	421.92	8
1840	421.933	11	1840	421.933	8	1840	421.933	8
1841	421.945	9	1841	421.945	11	1841	421.945	10
1842	421.957	8	1842	421.957	12	1842	421.957	4
1843	421.969	12	1843	421.969	13	1843	421.969	9
1844	421.981	11	1844	421.981	8	1844	421.981	7
1845	421.993	9	1845	421.993	10	1845	421.993	8
1846	422.005	8	1846	422.005	12	1846	422.005	5
1847	422.017	12	1847	422.017	12	1847	422.017	8
1848	422.029	10	1848	422.029	10	1848	422.029	9
1849	422.041	9	1849	422.041	10	1849	422.041	8
1850	422.053	7	1850	422.053	11	1850	422.053	3
1851	422.065	12	1851	422.065	12	1851	422.065	8
1852	422.077	10	1852	422.077	10	1852	422.077	8
1853	422.089	8	1853	422.089	9	1853	422.089	8
1854	422.102	5	1854	422.102	10	1854	422.102	3
1855	422.114	8	1855	422.114	12	1855	422.114	8
1856	422.126	10	1856	422.126	10	1856	422.126	9
1857	422.138	7	1857	422.138	10	1857	422.138	8
1858	422.15	4	1858	422.15	9	1858	422.15	3
1859	422.162	9	1859	422.162	11	1859	422.162	7
1860	422.174	10	1860	422.174	10	1860	422.174	9
1861	422.186	6	1861	422.186	10	1861	422.186	7
1862	422.198	4	1862	422.198	9	1862	422.198	4
1863	422.21	9	1863	422.21	11	1863	422.21	6
1864	422.223	11	1864	422.223	10	1864	422.223	8
1865	422.235	7	1865	422.235	10	1865	422.235	8
1866	422.247	6	1866	422.247	10	1866	422.247	4
1867	422.259	10	1867	422.259	10	1867	422.259	6
1868	422.271	12	1868	422.271	9	1868	422.271	9
1869	422.283	8	1869	422.283	10	1869	422.283	10
1870	422.295	7	1870	422.295	9	1870	422.295	3
1871	422.307	12	1871	422.307	10	1871	422.307	7
1872	422.319	11	1872	422.319	11	1872	422.319	8
1873	422.331	7	1873	422.331	11	1873	422.331	10
1874	422.343	6	1874	422.343	12	1874	422.343	3
1875	422.355	11	1875	422.355	10	1875	422.355	6
1876	422.368	10	1876	422.368	12	1876	422.368	9
1877	422.38	6	1877	422.38	8	1877	422.38	10
1878	422.392	5	1878	422.392	10	1878	422.392	1
1879	422.404	9	1879	422.404	8	1879	422.404	6
1880	422.416	10	1880	422.416	11	1880	422.416	7
1881	422.428	9	1881	422.428	8	1881	422.428	11
1882	422.44	6	1882	422.44	9	1882	422.44	2
1883	422.452	10	1883	422.452	9	1883	422.452	5
1884	422.464	11	1884	422.464	11	1884	422.464	7
1885	422.476	7	1885	422.476	8	1885	422.476	10
1886	422.488	8	1886	422.488	10	1886	422.488	3
1887	422.5	4	1887	422.5	9	1887	422.5	5
1888	422.513	10	1888	422.513	10	1888	422.513	5
1889	422.525	6	1889	422.525	8	1889	422.525	10
1890	422.537	6	1890	422.537	10	1890	422.537	2
1891	422.549	5	1891	422.549	7	1891	422.549	5
1892	422.561	9	1892	422.561	9	1892	422.561	6
1893	422.573	6	1893	422.573	8	1893	422.573	9
1894	422.585	7	1894	422.585	11	1894	422.585	2
1895	422.597	5	1895	422.597	8	1895	422.597	5
1896	422.609	9	1896	422.609	9	1896	422.609	7
1897	422.621	5	1897	422.621	8	1897	422.621	9
1898	422.634	5	1898	422.634	11	1898	422.634	1
1899	422.646	5	1899	422.646	8	1899	422.646	4
1900	422.658	8	1900	422.658	8	1900	422.658	5
1901	422.67	6	1901	422.67	8	1901	422.67	9
1902	422.682	6	1902	422.682	10	1902	422.682	3
1903	422.694	7	1903	422.694	7	1903	422.694	5
1904	422.706	8	1904	422.706	7	1904	422.706	6
1905	422.718	5	1905	422.718	8	1905	422.718	9
1906	422.73	6	1906	422.73	10	1906	422.73	3
1907	422.742	5	1907	422.742	7	1907	422.742	6
1908	422.755	9	1908	422.755	8	1908	422.755	5
1909	422.767	5	1909	422.767	7	1909	422.767	10
1910	422.779	5	1910	422.779	10	1910	422.779	3
1911	422.791	5	1911	422.791	7	1911	422.791	5
1912	422.803	8	1912	422.803	8	1912	422.803	5
1913	422.815	6	1913	422.815	6	1913	422.815	8
1914	422.827	4	1914	422.827	10	1914	422.827	3
1915	422.839	6	1915	422.839	7	1915	422.839	5
1916	422.851	10	1916	422.851	9	1916	422.851	5
1917	422.863	7	1917	422.863	5	1917	422.863	9
1918	422.875	4	1918	422.875	9	1918	422.875	2
1919	422.887	6	1919	422.887	6	1919	422.887	5
1920	422.9	9	1920	422.9	9	1920	422.9	6
1921	422.912	7	1921	422.912	5	1921	422.912	8
1922	422.924	4	1922	422.924	9	1922	422.924	3
1923	422.936	6	1923	422.936	6	1923	422.936	4
1924	422.948	8	1924	422.948	9	1924	422.948	5
1925	422.96	8	1925	422.96	5	1925	422.96	8
1926	422.972	4	1926	422.972	9	1926	422.972	4
1927	422.984	6	1927	422.984	6	1927	422.984	5
1928	422.996	7	1928	422.996	9	1928	422.996	5
1929	423.009	6	1929	423.009	5	1929	423.009	8
1930	423.021	4	1930	423.021	10	1930	423.021	4
1931	423.033	7	1931	423.033	7	1931	423.033	5
1932	423.045	8	1932	423.045	8	1932	423.045	4
1933	423.057	6	1933	423.057	4	1933	423.057	9
1934	423.069	3	1934	423.069	9	1934	423.069	3
1935	423.081	7	1935	423.081	7	1935	423.081	5
1936	423.093	6	1936	423.093	9	1936	423.093	3
1937	423.105	5	1937	423.105	5	1937	423.105	9
1938	423.117	2	1938	423.117	10	1938	423.117	2
1939	423.13	6	1939	423.13	5	1939	423.13	4
1940	423.142	6	1940	423.142	9	1940	423.142	3
1941	423.154	6	1941	423.154	4	1941	423.154	7
1942	423.166	2	1942	423.166	10	1942	423.166	2
1943	423.178	3	1943	423.178	6	1943	423.178	5
1944	423.19	5	1944	423.19	9	1944	423.19	4
1945	423.202	6	1945	423.202	3	1945	423.202	7
1946	423.214	3	1946	423.214	11	1946	423.214	3
1947	423.226	3	1947	423.226	8	1947	423.226	4
1948	423.238	7	1948	423.238	8	1948	423.238	4
1949	423.25	10	1949	423.25	1	1949	423.25	7
1950	423.263	1	1950	423.263	10	1950	423.263	1
1951	423.275	3	1951	423.275	7	1951	423.275	3
1952	423.287	11	1952	423.287	10	1952	423.287	2
1953	423.299	8	1953	423.299	3	1953	423.299	5
1954	423.311	4	1954	423.311	10	1954	423.311	2
1955	423.323	5	1955	423.323	6	1955	423.323	4
1956	423.335	10	1956	423.335	11	1956	423.335	2
1957	423.347	11	1957	423.347	4	1957	423.347	7
1958	423.359	8	1958	423.359	10	1958	423.359	4
1959	423.372	7	1959	423.372	7	1959	423.372	4
1960	423.384	12	1960	423.384	11	1960	423.384	2
1961	423.396	11	1961	423.396	5	1961	423.396	7
1962	423.408	10	1962	423.408	12	1962	423.408	5
1963	423.42	10	1963	423.42	9	1963	423.42	5
1964	423.432	11	1964	423.432	10	1964	423.432	3
1965	423.444	13	1965	423.444	8	1965	423.444	9
1966	423.456	10	1966	423.456	12	1966	423.456	6
1967	423.468	13	1967	423.468	11	1967	423.468	5
1968	423.48	12	1968	423.48	10	1968	423.48	4
1969	423.493	12	1969	423.493	7	1969	423.493	9
1970	423.505	7	1970	423.505	14	1970	423.505	5
1971	423.517	10	1971	423.517	9	1971	423.517	6
1972	423.529	12	1972	423.529	10	1972	423.529	5
1973	423.541	10	1973	423.541	7	1973	423.541	8
1974	423.553	5	1974	423.553	14	1974	423.553	5
1975	423.565	10	1975	423.565	10	1975	423.565	6
1976	423.577	10	1976	423.577	8	1976	423.577	4
1977	423.589	7	1977	423.589	6	1977	423.589	8
1978	423.601	5	1978	423.601	12	1978	423.601	5
1979	423.614	10	1979	423.614	9	1979	423.614	6
1980	423.626	9	1980	423.626	8	1980	423.626	5
1981	423.638	4	1981	423.638	6	1981	423.638	8
1982	423.65	2	1982	423.65	11	1982	423.65	4
1983	423.662	8	1983	423.662	8	1983	423.662	4
1984	423.674	9	1984	423.674	8	1984	423.674	4
1985	423.686	5	1985	423.686	5	1985	423.686	7
1986	423.698	2	1986	423.698	9	1986	423.698	4
1987	423.71	6	1987	423.71	5	1987	423.71	6
1988	423.723	7	1988	423.723	8	1988	423.723	3
1989	423.735	4	1989	423.735	4	1989	423.735	7
1990	423.747	1	1990	423.747	9	1990	423.747	3
1991	423.759	6	1991	423.759	5	1991	423.759	6
1992	423.771	7	1992	423.771	7	1992	423.771	4
1993	423.783	5	1993	423.783	4	1993	423.783	8
1994	423.795	0	1994	423.795	8	1994	423.795	3
1995	423.807	7	1995	423.807	5	1995	423.807	5
1996	423.819	8	1996	423.819	6	1996	423.819	4
[truncated: 100,026 more rows]

## Sheet: Fig3j_SupplementaryFig9d
Experimental data			Prediction		Prediction Shin et al.
ISG15:Ub2	Bound-signal Intensity	Error bar	ISG15:Ub2	Bound-signal Intensity	ISG15:Ub2	Bound-signal Intensity
0	1	0.04896	0	1	0	1
0.49306	0.94751	0.05021	0.02497	0.99784	0.12589	0.95602
0.741	0.82677	0.04897	0.05004	0.99567	0.25448	0.90557
1.0072	0.70866	0.04882	0.07521	0.99349	0.38587	0.84743
1.4963	0.58268	0.04969	0.1005	0.99131	0.49306	0.79468
2.0153	0.43045	0.05084	0.12589	0.98911	0.55753	0.76143
			0.15139	0.9869	0.62256	0.7261
			0.17699	0.98468	0.68814	0.68876
			0.20271	0.98243	0.741	0.65756
			0.22854	0.98016	0.81006	0.61513
			0.25448	0.97786	0.87983	0.57131
			0.28053	0.97551	0.9503	0.52655
			0.3067	0.9731	1.0072	0.49047
			0.33297	0.97059	1.1332	0.41311
			0.35936	0.96796	1.2611	0.34032
			0.38587	0.96512	1.3909	0.27591
			0.41249	0.96193	1.4963	0.23215
			0.43923	0.9581	1.6299	0.18763
			0.46608	0.95306	1.7655	0.15332
			0.49306	0.94575	1.9034	0.12719
			0.49306	0.94575	2.0153	0.11081
			0.50591	0.94133
			0.51878	0.93614
			0.53168	0.93029
			0.54459	0.92392
			0.55753	0.9172
			0.57049	0.91026
			0.58348	0.90319
			0.59648	0.89605
			0.60951	0.88891
			0.62256	0.88177
			0.63563	0.87467
			0.64872	0.86762
			0.66184	0.86063
			0.67498	0.8537
			0.68814	0.84684
			0.70132	0.84006
			0.71452	0.83336
			0.72775	0.82673
			0.741	0.82018
			0.741	0.82018
			0.75476	0.81338
			0.76854	0.80666
			0.78236	0.80003
			0.7962	0.79348
			0.81006	0.78701
			0.82396	0.78062
			0.83788	0.77431
			0.85184	0.76808
			0.86582	0.76192
			0.87983	0.75585
			0.89386	0.74985
			0.90793	0.74392
			0.92202	0.73806
			0.93615	0.73228
			0.9503	0.72657
			0.96448	0.72092
			0.97869	0.71535
			0.99293	0.70984
			1.0072	0.70439
			1.0072	0.70439
			1.0322	0.6952
			1.0573	0.68619
			1.0825	0.67737
			1.1078	0.66874
			1.1332	0.66028
			1.1586	0.65198
			1.1841	0.64386
			1.2097	0.63589
			1.2353	0.62807
			1.2611	0.62041
			1.2869	0.6129
			1.3128	0.60552
			1.3387	0.59829
			1.3648	0.59119
			1.3909	0.58421
			1.4172	0.57737
			1.4435	0.57065
			1.4698	0.56405
			1.4963	0.55756
			1.4963	0.55756
			1.5228	0.55119
			1.5495	0.54494
			1.5762	0.53878
			1.603	0.53274
			1.6299	0.52679
			1.6568	0.52095
			1.6839	0.5152
			1.711	0.50955
			1.7382	0.50399
			1.7655	0.49852
			1.7929	0.49314
			1.8204	0.48785
			1.848	0.48264
			1.8756	0.47751
			1.9034	0.47246
			1.9312	0.46749
			1.9592	0.4626
			1.9872	0.45778
			2.0153	0.45303
	Graphs plotted in OriginPro v8

## Sheet: Fig3k
Uncropped gels
	left										right

## Sheet: Fig4b
Uncropped gel

## Sheet: Fig4c
Bar chart
	Cβ-Cβ distance [Angstroms]
cross-link 1	14.1
cross-link 2	17.5
	Graphs plotted in Prism 9 version 9.5.0
Processed XL-MS data for 5 replicates
C111S_PLpro_hISG15_DMTMM_1
Id	Protein1	Protein2	XLType	AbsPos1	AbsPos2	deltaAA	Mr	Mz	z	Error_rel[ppm]	nseen	ld-Score	Residues
VLNVVCKTCGQQQTTLK-SSTYEVR-a7-b5	C111S_PLpro	hISG15	inter-protein xl	190	97	93	2798.4	933.809	3	-1	2	35.99	KE
AQITQKIGVHAFQQR-TFYVLPNDDTLR-a6-b9	hISG15	C111S_PLpro	inter-protein xl	35	62	27	3158.66	1053.89	3	-0.7	11	29.41	KD
AQITQKIGVHAFQQR-TFYVLPNDDTLR-a6-b8	hISG15	C111S_PLpro	inter-protein xl	35	61	26	3158.66	790.673	4	-0.7	4	23.82	KD
SSTYEVRLTQTVAHLK-KGVQIPCTCGK-a5-b1	hISG15	C111S_PLpro	inter-protein xl	97	218	121	3060.6	766.158	4	5	3	18	EK
C111S_PLpro_hISG15_DMTMM_2
Id	Protein1	Protein2	XLType	AbsPos1	AbsPos2	deltaAA	Mr	Mz	z	Error_rel[ppm]	nseen	ld-Score	Residues
AQITQKIGVHAFQQR-TFYVLPNDDTLR-a6-b9	hISG15	C111S_PLpro	inter-protein xl	35	62	27	3158.66	790.673	4	-0.4	7	31.01	KD
AQITQKIGVHAFQQR-TFYVLPNDDTLR-a6-b8	hISG15	C111S_PLpro	inter-protein xl	35	61	26	3158.66	632.74	5	0.2	5	28.88	KD
VPLASQGLGPGSTVLLVVDKCDEPLSILVR-VLNVVCKTCGQQQTTLK-a22-b7	hISG15	C111S_PLpro	inter-protein xl	79	190	111	5089.74	1018.96	5	0.7	1	24.58	DK
TFYVLPNDDTLRVEAFEYYHTTDPSFLGR-AQITQKIGVHAFQQR-a9-b6	C111S_PLpro	hISG15	inter-protein xl	62	35	27	5171.59	1035.33	5	0.6	1	17.93	DK
XLAGNEFQVSLSSSMSVSELKAQITQK-TVGELGDVR-a21-b7	hISG15	C111S_PLpro	inter-protein xl	29	164	135	3854.94	1285.99	3	1.1	1	17.55	KD
C111S_PLpro_hISG15_DMTMM_3
Id	Protein1	Protein2	XLType	AbsPos1	AbsPos2	deltaAA	Mr	Mz	z	Error_rel[ppm]	nseen	ld-Score	Residues
HITSKETLYCIDGALLTK-SSTYEVR-a5-b5	C111S_PLpro	hISG15	inter-protein xl	279	97	182	2884.46	722.123	4	-0.6	1	40.78	KE
AQITQKIGVHAFQQR-TFYVLPNDDTLR-a6-b9	hISG15	C111S_PLpro	inter-protein xl	35	62	27	3158.66	790.673	4	-0.6	8	32.55	KD
AQITQKIGVHAFQQR-TFYVLPNDDTLR-a6-b8	hISG15	C111S_PLpro	inter-protein xl	35	61	26	3158.66	632.74	5	-0.2	4	27.62	KD
C111S_PLpro_hISG15_DMTMM_4
Id	Protein1	Protein2	XLType	AbsPos1	AbsPos2	deltaAA	Mr	Mz	z	Error_rel[ppm]	nseen	ld-Score	Residues
HITSKETLYCIDGALLTK-SSTYEVR-a5-b5	C111S_PLpro	hISG15	inter-protein xl	279	97	182	2884.46	722.123	4	-1.2	1	40.9	KE
AQITQKIGVHAFQQR-TFYVLPNDDTLR-a6-b9	hISG15	C111S_PLpro	inter-protein xl	35	62	27	3158.65	1053.89	3	-4.5	6	28.86	KD
AQITQKIGVHAFQQR-TFYVLPNDDTLR-a6-b8	hISG15	C111S_PLpro	inter-protein xl	35	61	26	3158.66	632.74	5	-0.7	3	27.96	KD
LAVHPSGVALQDRVPLASQGLGPGSTVLLVVDK-IKPHNSHEGK-a32-b2	hISG15	C111S_PLpro	inter-protein xl	76	45	31	4420.44	885.096	5	1.8	1	17.9	DK
TFYVLPNDDTLRVEAFEYYHTTDPSFLGR-AQITQKIGVHAFQQR-a9-b6	C111S_PLpro	hISG15	inter-protein xl	62	35	27	5171.59	1035.33	5	0.6	2	16.49	DK
C111S_PLpro_hISG15_DMTMM_5
Id	Protein1	Protein2	XLType	AbsPos1	AbsPos2	deltaAA	Mr	Mz	z	Error_rel[ppm]	nseen	ld-Score	Residues
SSEYKGPITDVFYKENSYTTTIK-SSTYEVR-a14-b5	C111S_PLpro	hISG15	inter-protein xl	306	97	209	3492.69	874.18	4	-0.9	1	39.89	KE
VLNVVCKTCGQQQTTLK-SSTYEVR-a7-b5	C111S_PLpro	hISG15	inter-protein xl	190	97	93	2798.4	933.809	3	-0.6	1	35.38	KE
AQITQKIGVHAFQQR-TFYVLPNDDTLR-a6-b9	hISG15	C111S_PLpro	inter-protein xl	35	62	27	3158.66	1053.9	3	0.8	6	28.74	KD
AQITQKIGVHAFQQR-TFYVLPNDDTLR-a6-b8	hISG15	C111S_PLpro	inter-protein xl	35	61	26	3158.66	632.739	5	-1.4	3	27.66	KD
TFYVLPNDDTLRVEAFEYYHTTDPSFLGR-AQITQKIGVHAFQQR-a9-b6	C111S_PLpro	hISG15	inter-protein xl	62	35	27	5171.59	1035.33	5	0.2	2	21.84	DK
SSTYEVRLTQTVAHLK-KGVQIPCTCGK-a5-b1	hISG15	C111S_PLpro	inter-protein xl	97	218	121	3060.6	766.157	4	4.5	2	16.03	EK
QQVSGLEGVQDDLFWLTFEGKPLEDQLPLGEYGLKPLSTVFXNLRLRGG-YLVQQESPFVXMSAPPAQYELK-a35-b6	hISG15	C111S_PLpro	inter-protein xl	143	238	95	8059.09	1344.19	6	3.8	1	15.25	KE

[truncated: 25 more sheets: Fig4d+f+g_SupplementaryFig11b+f, Fig5b+c+d+e, Fig5f, Fig5g, Fig5h, Fig5i, SupplementaryFig2b, SupplementaryFig2d, SupplementaryFig2h, SupplementaryFig3c, SupplementaryFig4e, SupplementaryFig9e, SupplementaryFig11a, SupplementaryFig11b, SupplementaryFig11c, SupplementaryFig11d, SupplementaryFig11e, SupplementaryFig11f, SupplementaryFig11g+h, SupplementaryFig11i …]
